# Supplementary material for: The γ-Adducin 1–357 fragment promotes tau pathology
Source: Frontiers journal article supplement (doi:10.3389/fnagi.2023.1241750), 2023-09-13

**Figure 1, A**

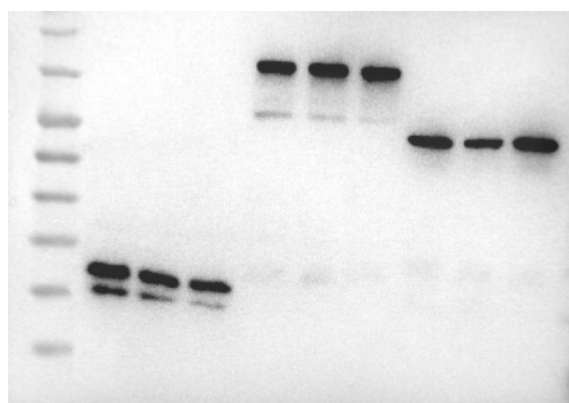

Anti-GST

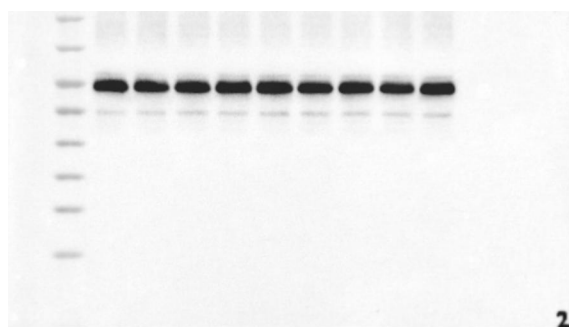

Anti-HA

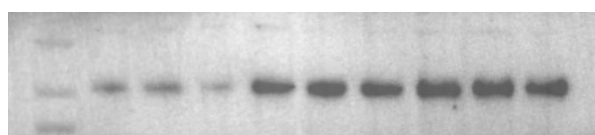

Anti-p-tau (Ser396)

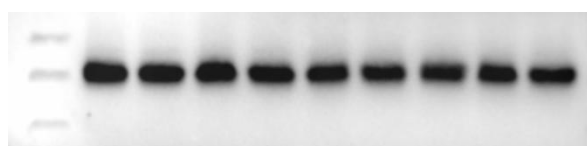

Anti-Tau5

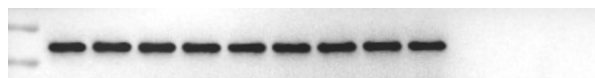

Anti-GAPDH

**Figure 1, C**

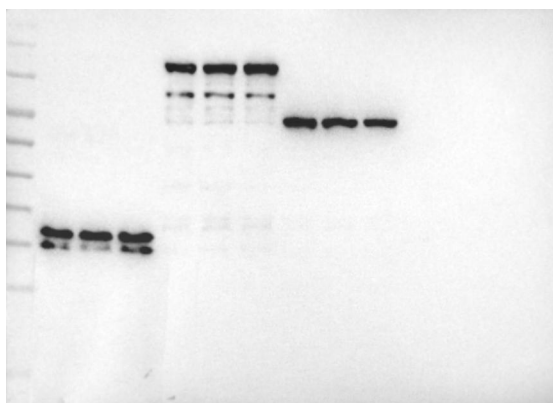

Anti-GST

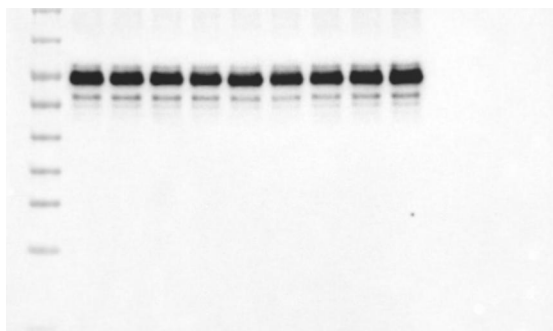

Anti-HA

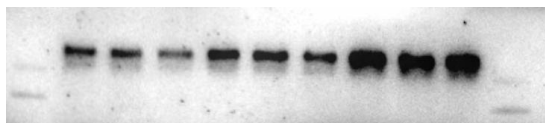

Anti-p-tau (Ser396)

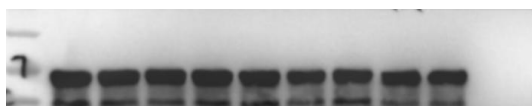

Anti-Tau5

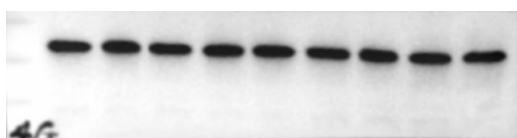

Anti-GAPDH

**Figure 2, A**

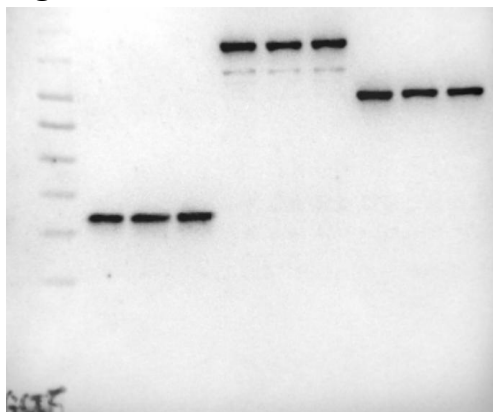

Anti-GFP

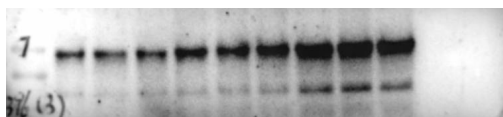

Anti-p-tau (Ser396)

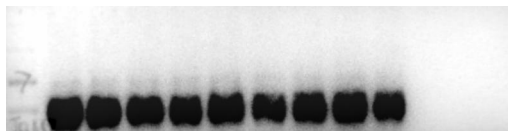

Anti-Tau5

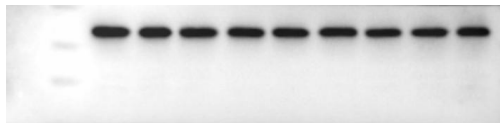

Anti-GAPDH

Figure 2, C

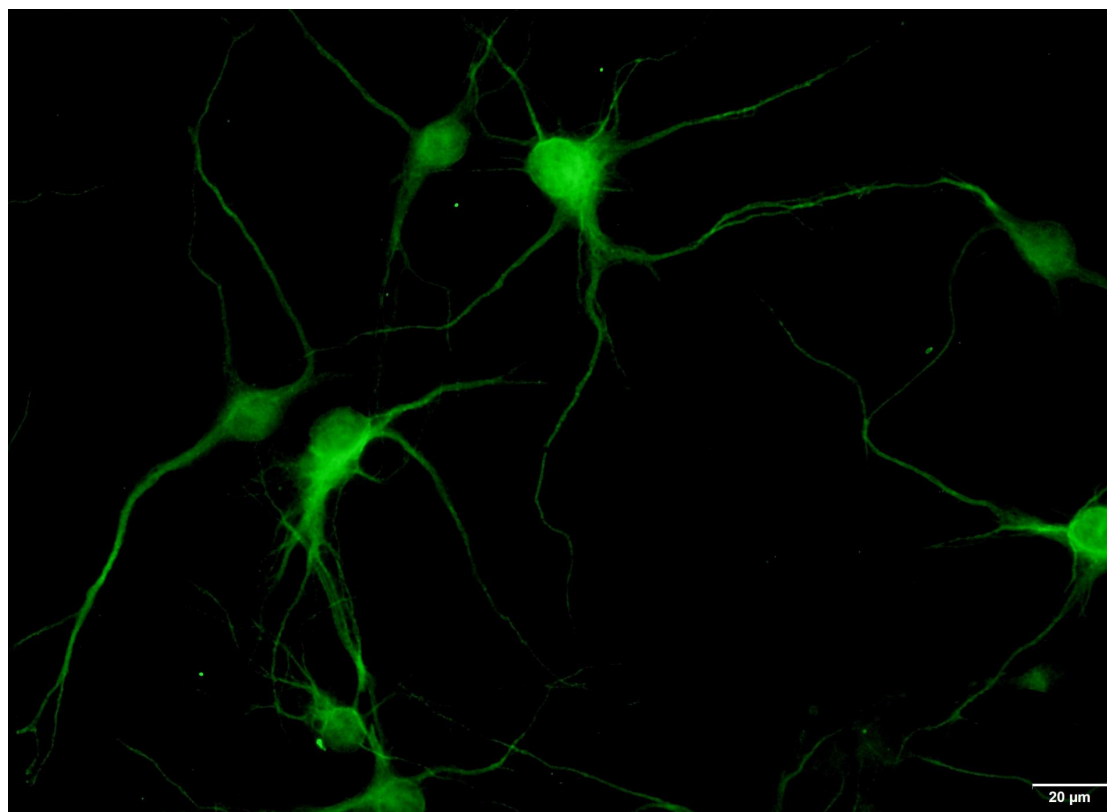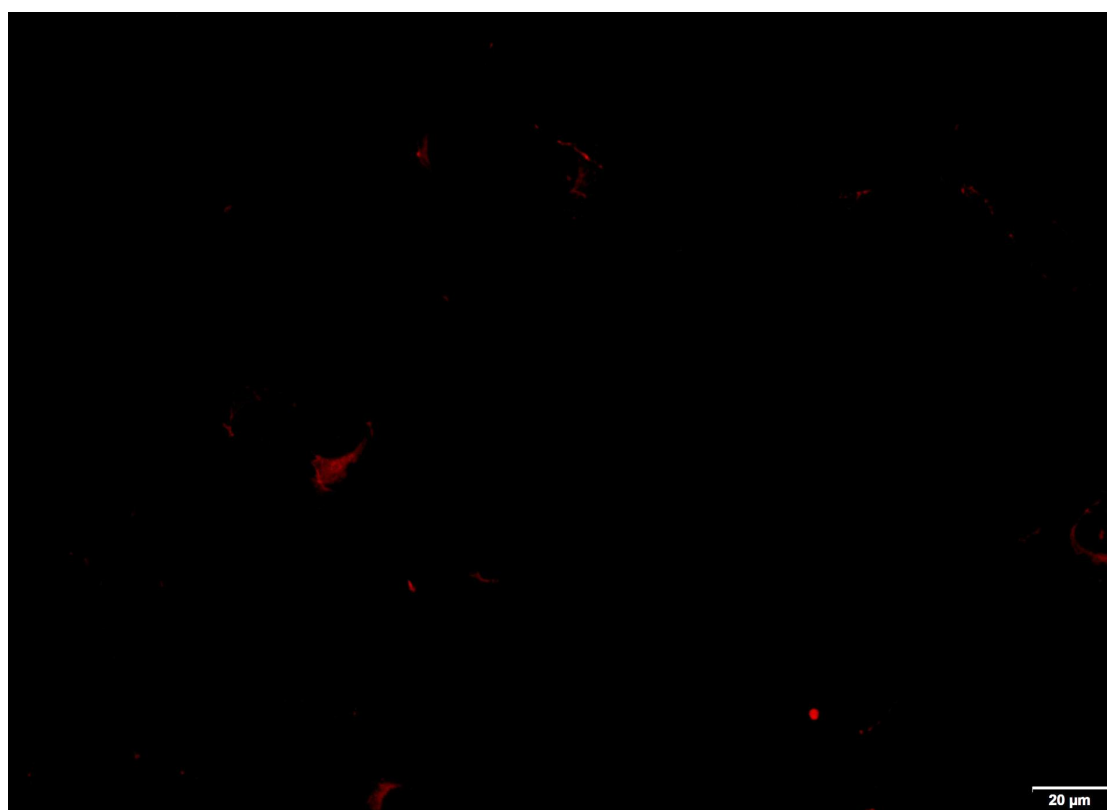

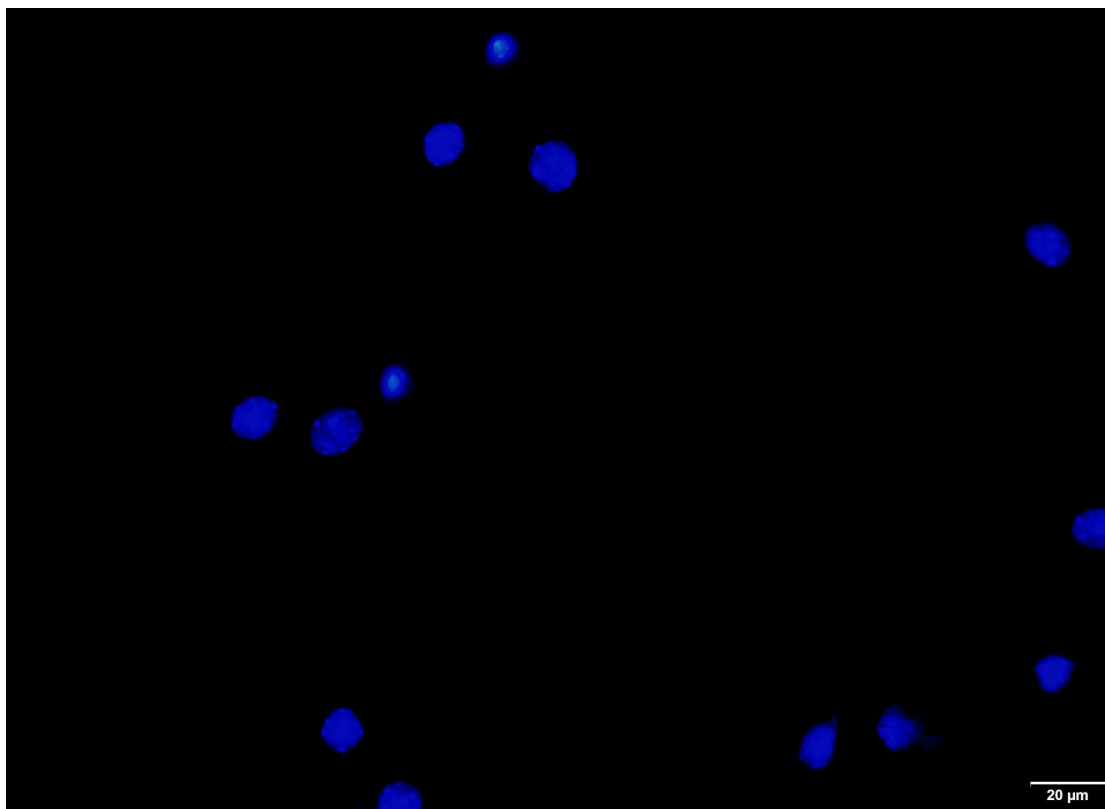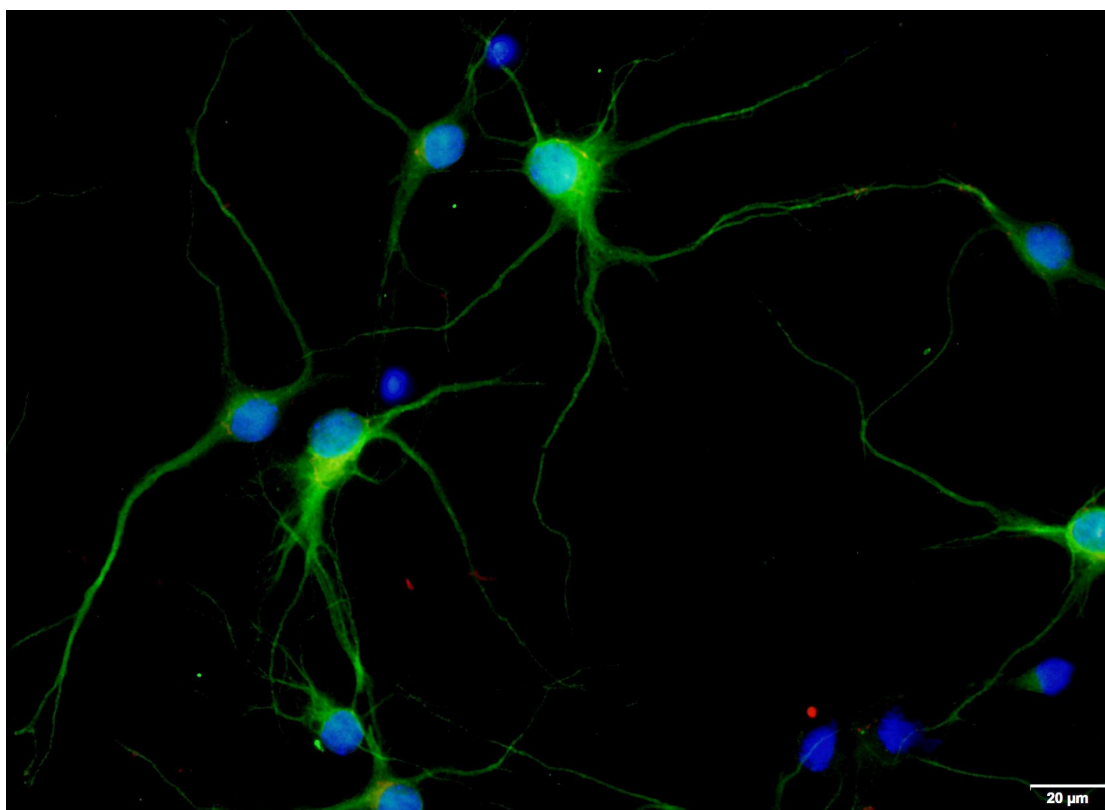

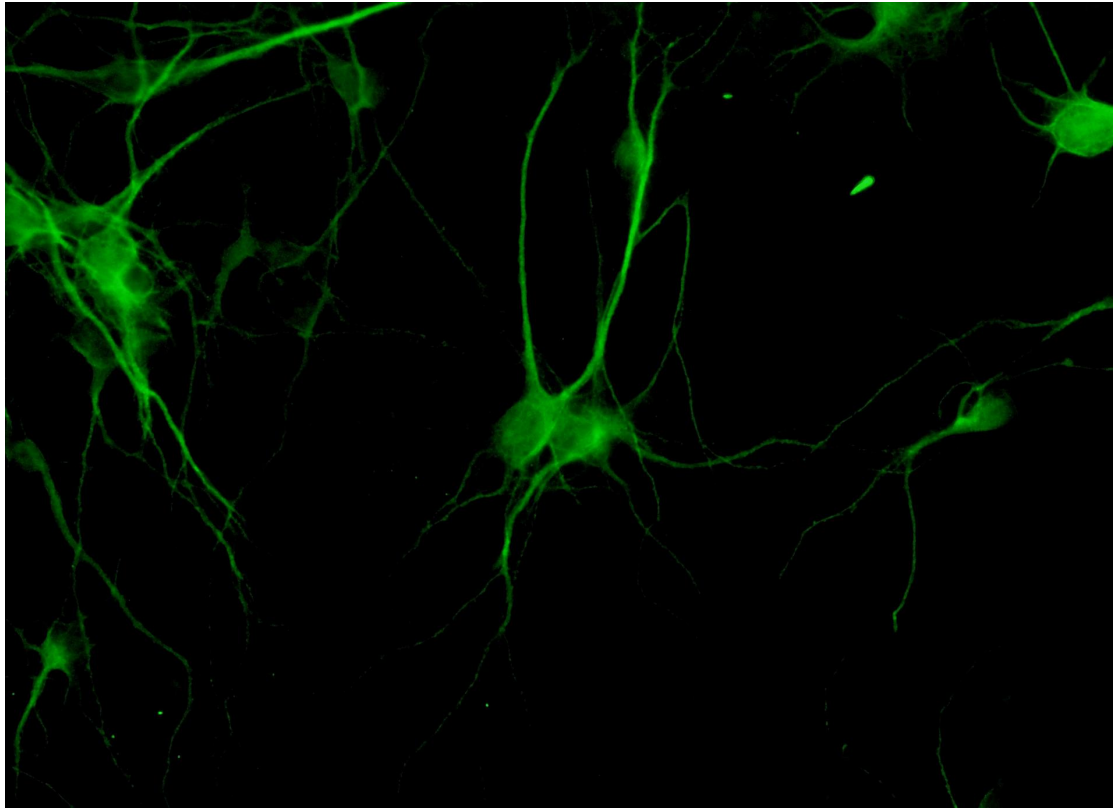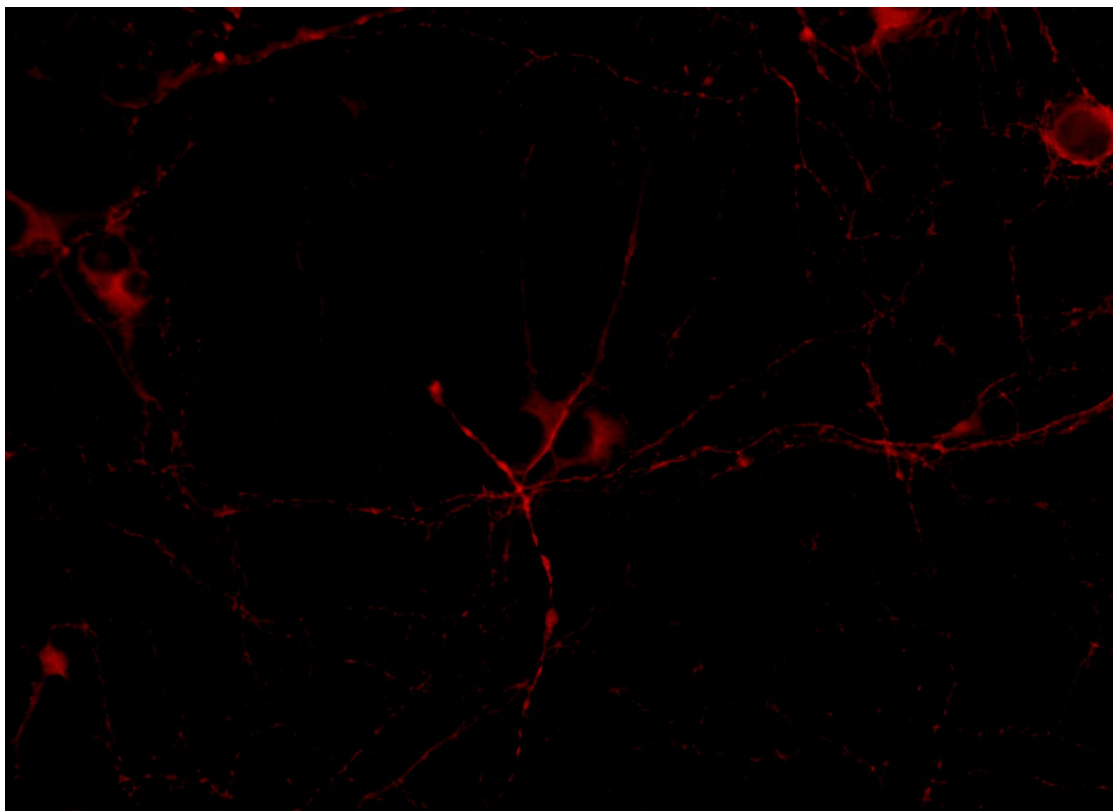

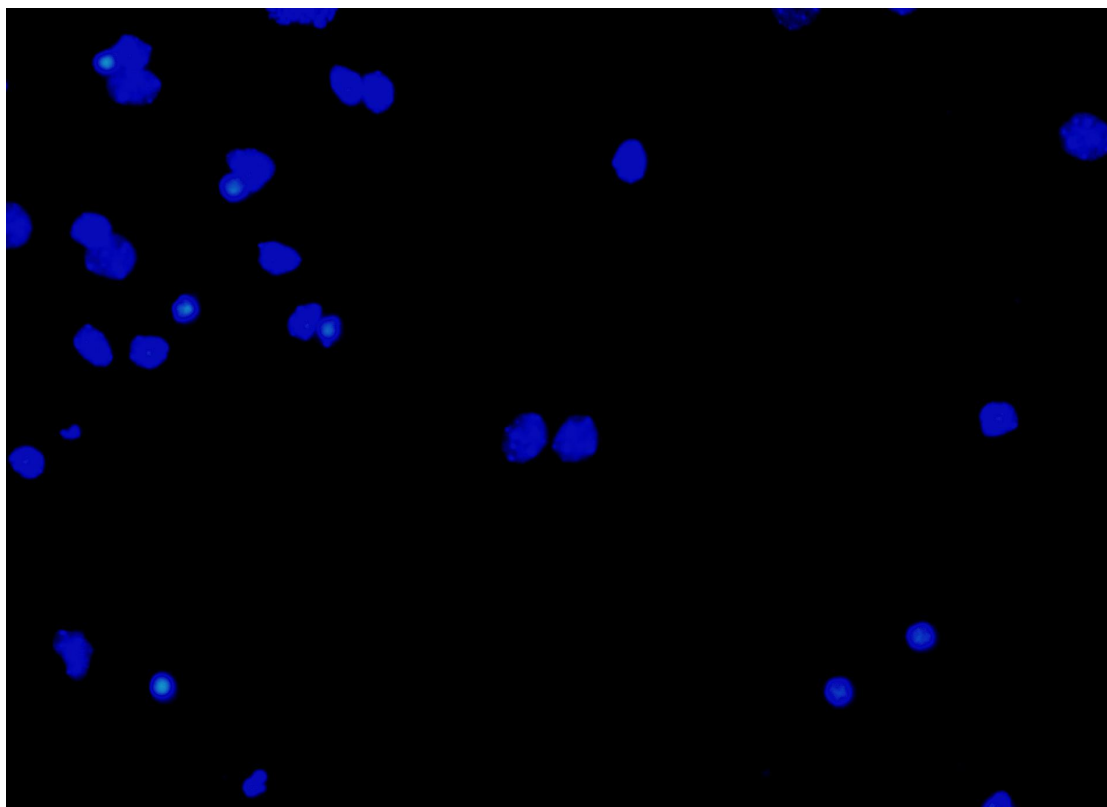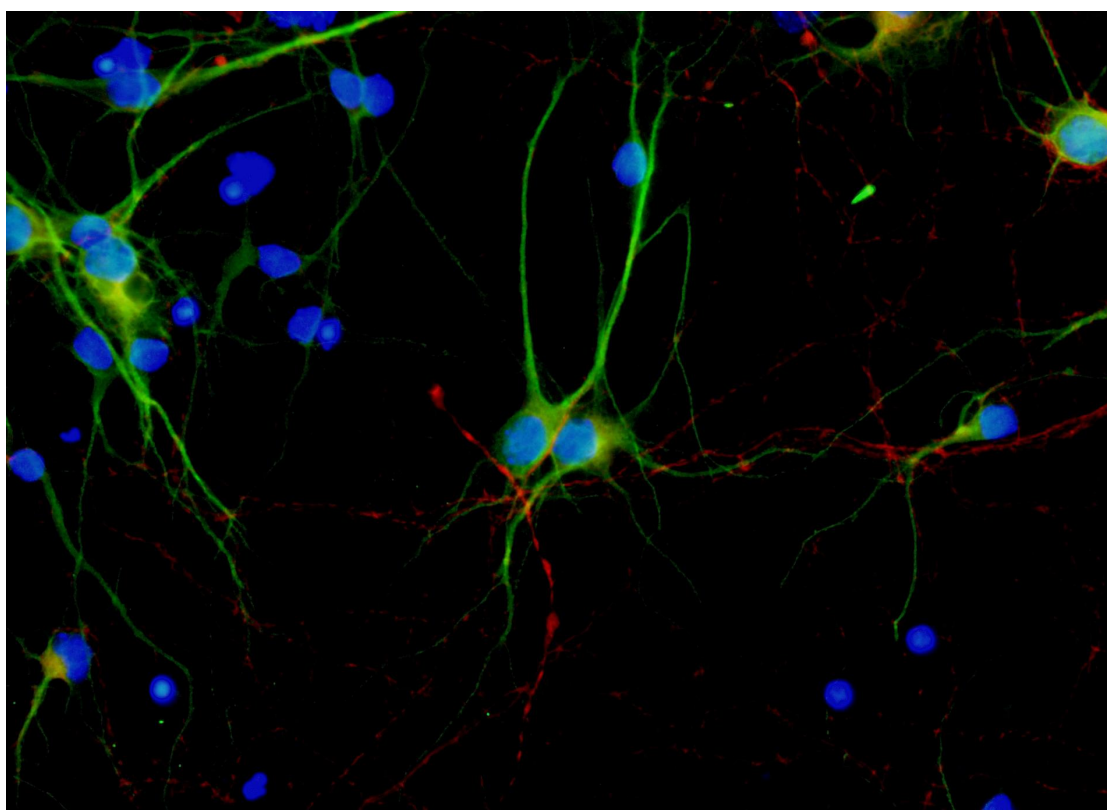

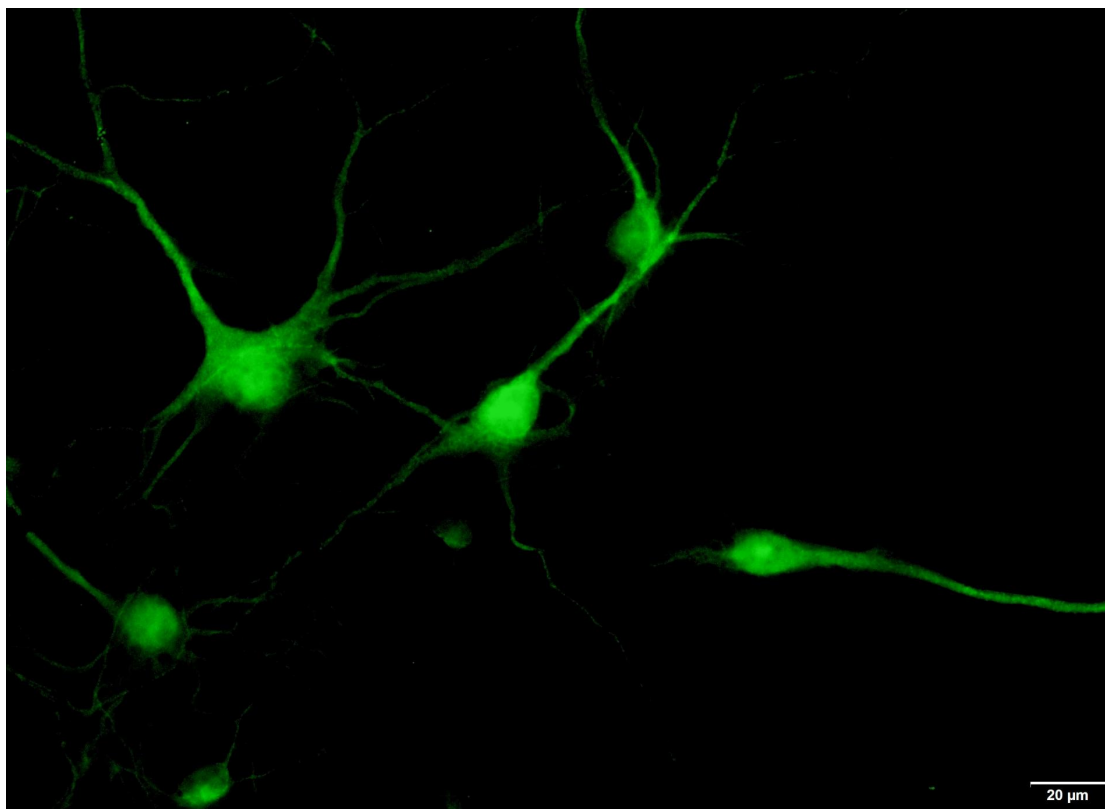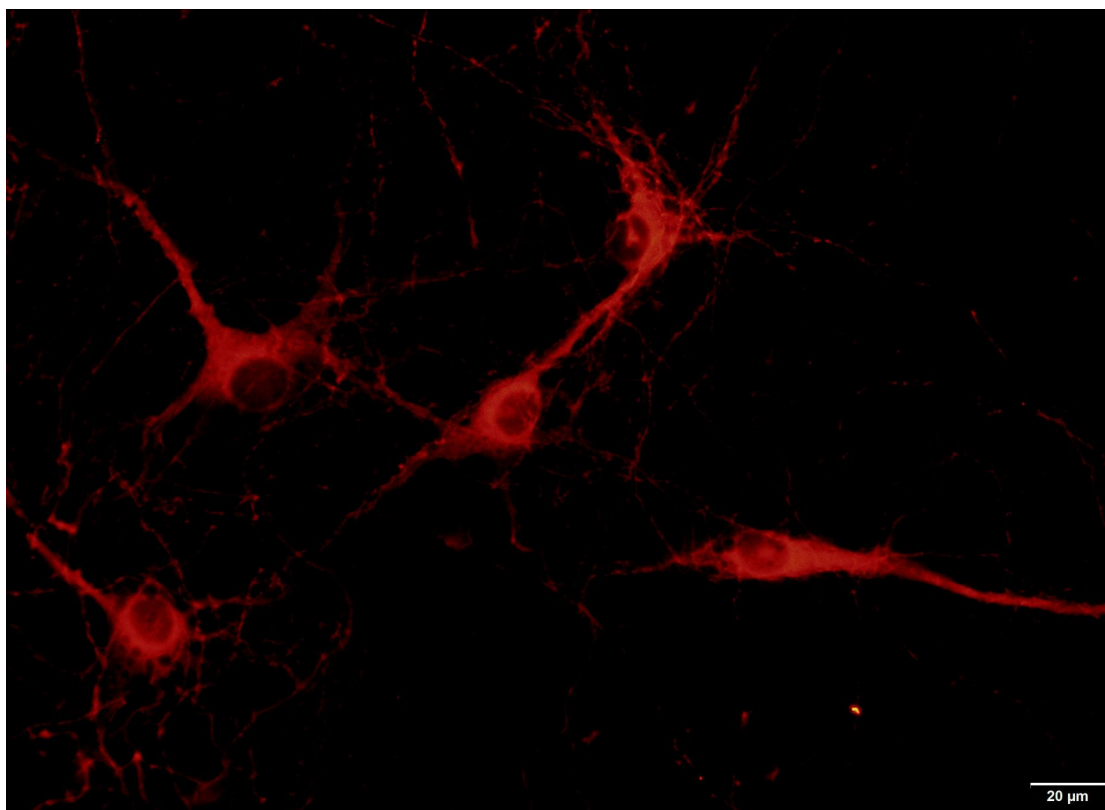



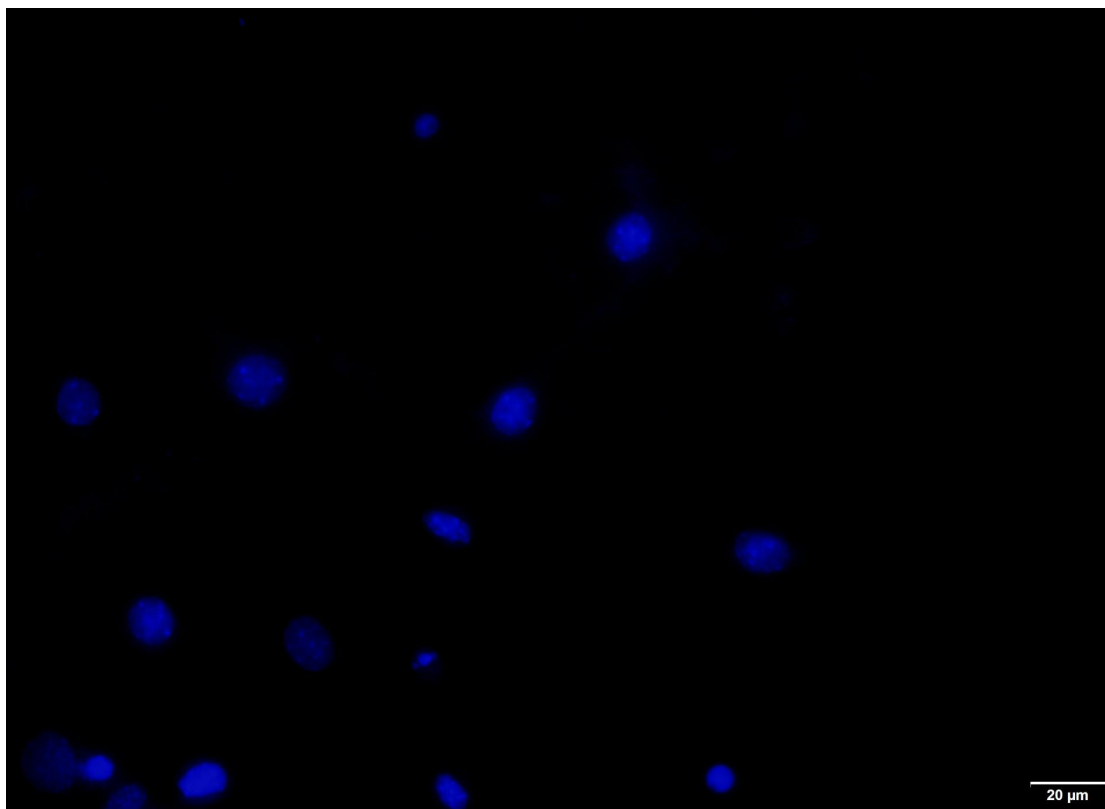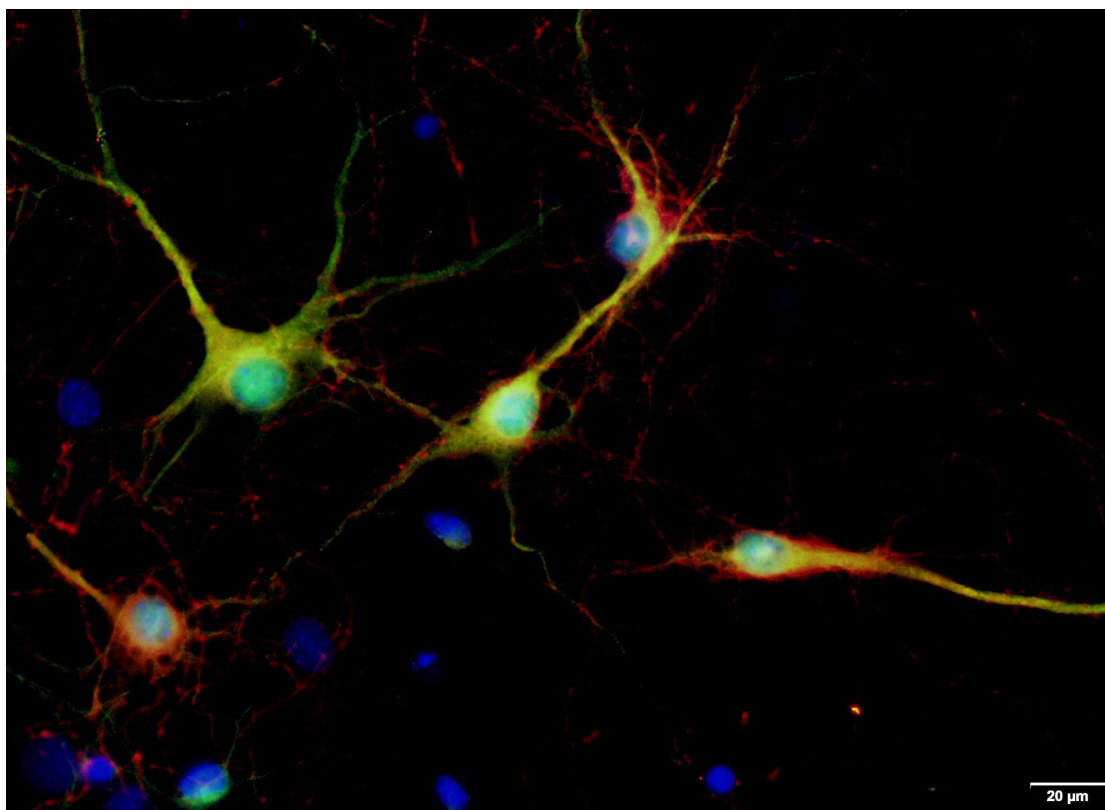

**Figure 3, A**

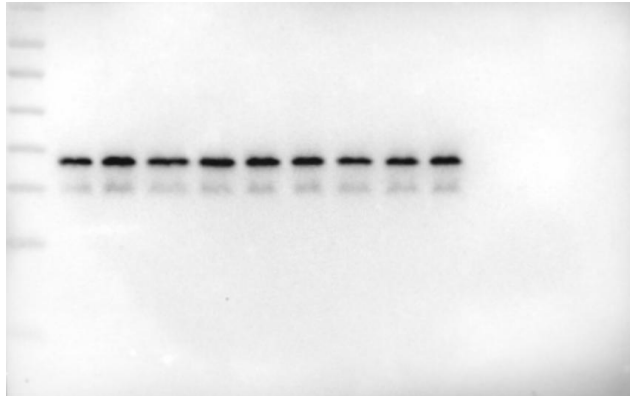

Anti-CDK5

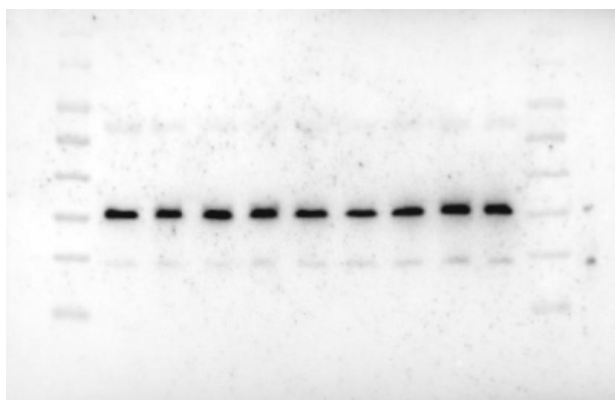

Anti-P35

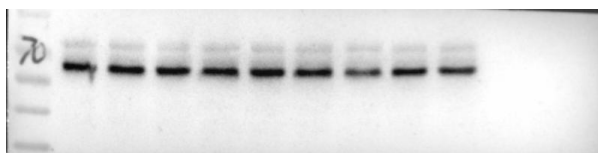

Anti-Akt

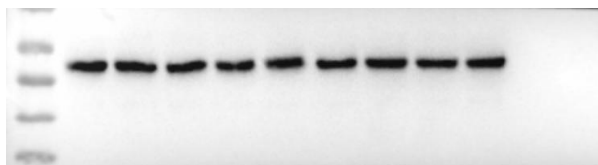

Anti-pAkt

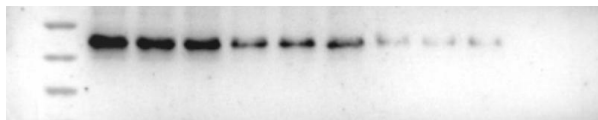

Anti-pGSK3 $\beta$ (Ser9)

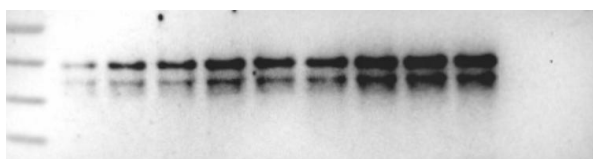

Anti-pGSK3 $\beta$ (Thr216)

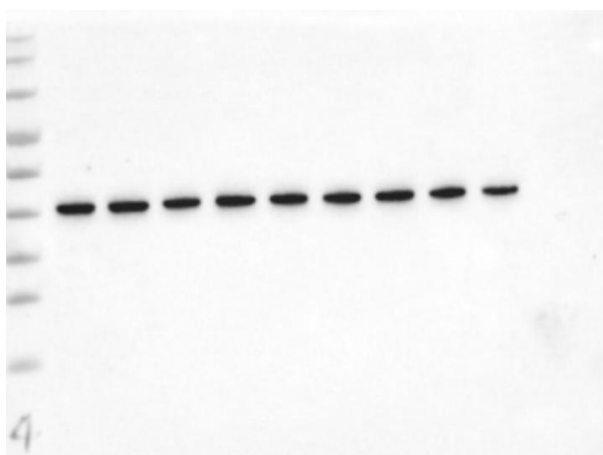

Anti-pGSK3 $\beta$ (Y174)

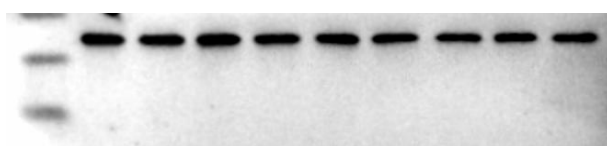

Anti-GAPDH

**Figure 3, C**

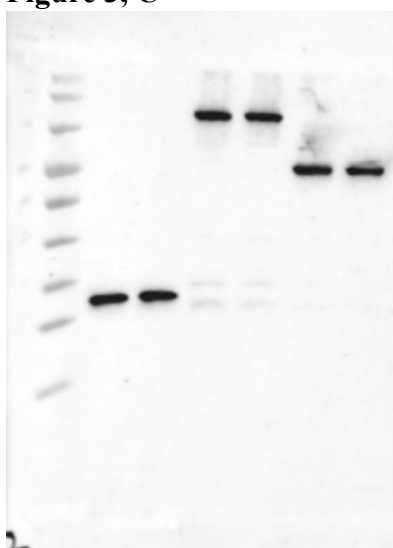

Anti-GFP

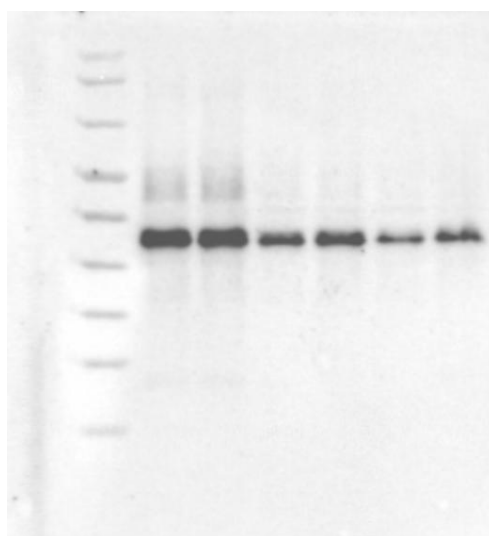

Anti-pGSK3 $\beta$ (Ser9)

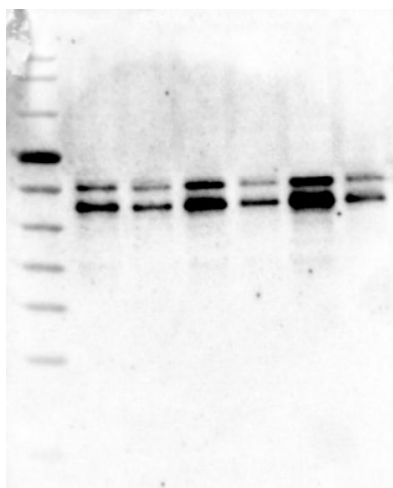

Anti-pGSK3 $\beta$ (Thr216)

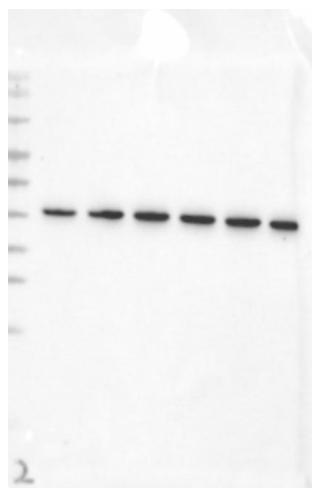

Anti-pGSK3 $\beta$ (Y174)

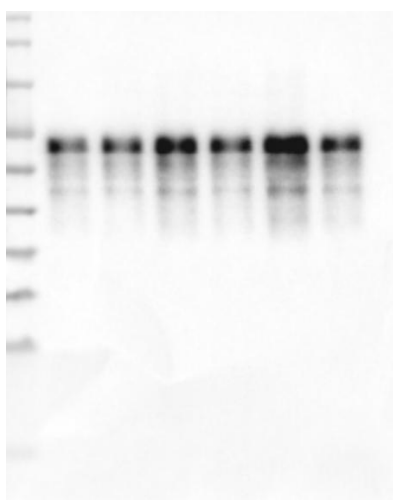

Anti-p-tau (Ser396)

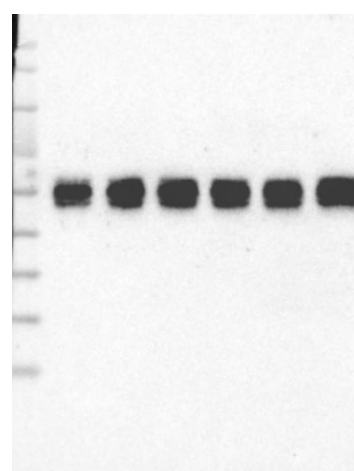

Anti-Tau5

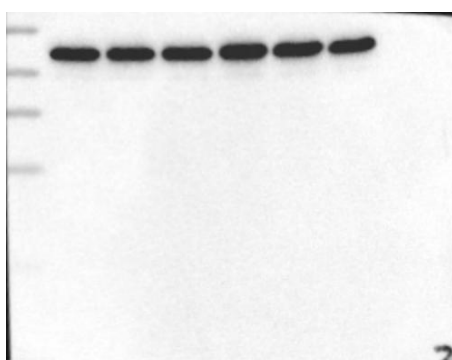

Anti-GAPDH

**Figure 4, A**

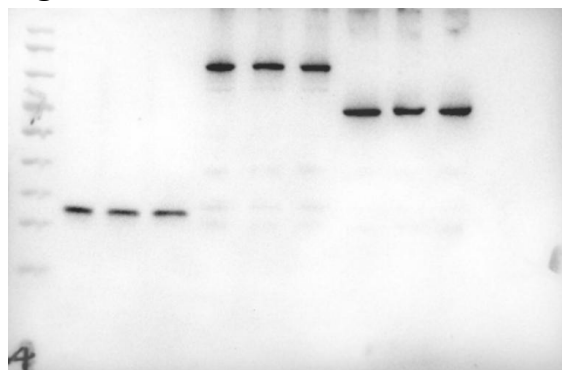

Anti-GFP

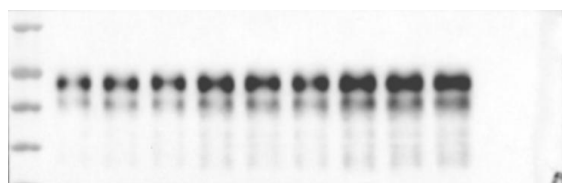

Anti-p-tau (Ser396)

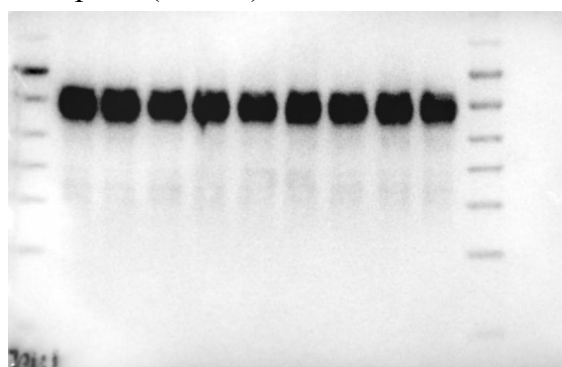

Anti-Tau5

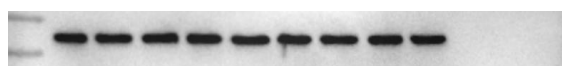

Anti-GAPDH

Figure 4,  
C

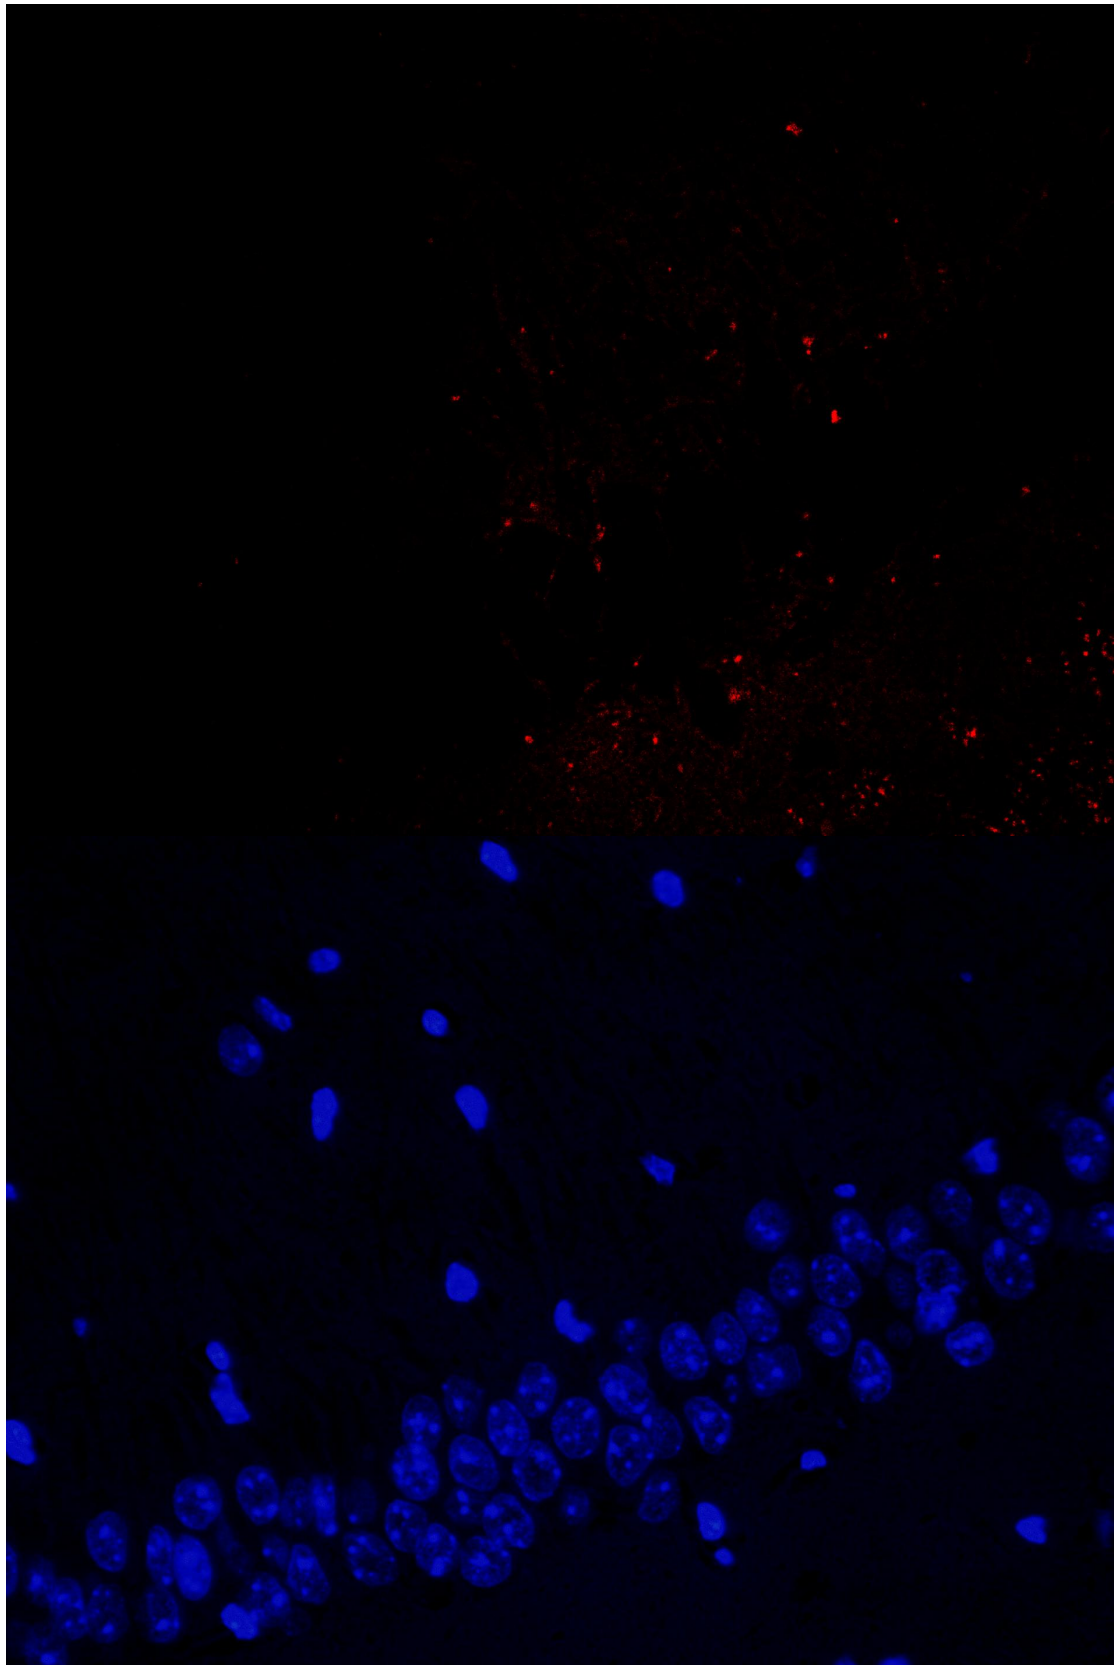

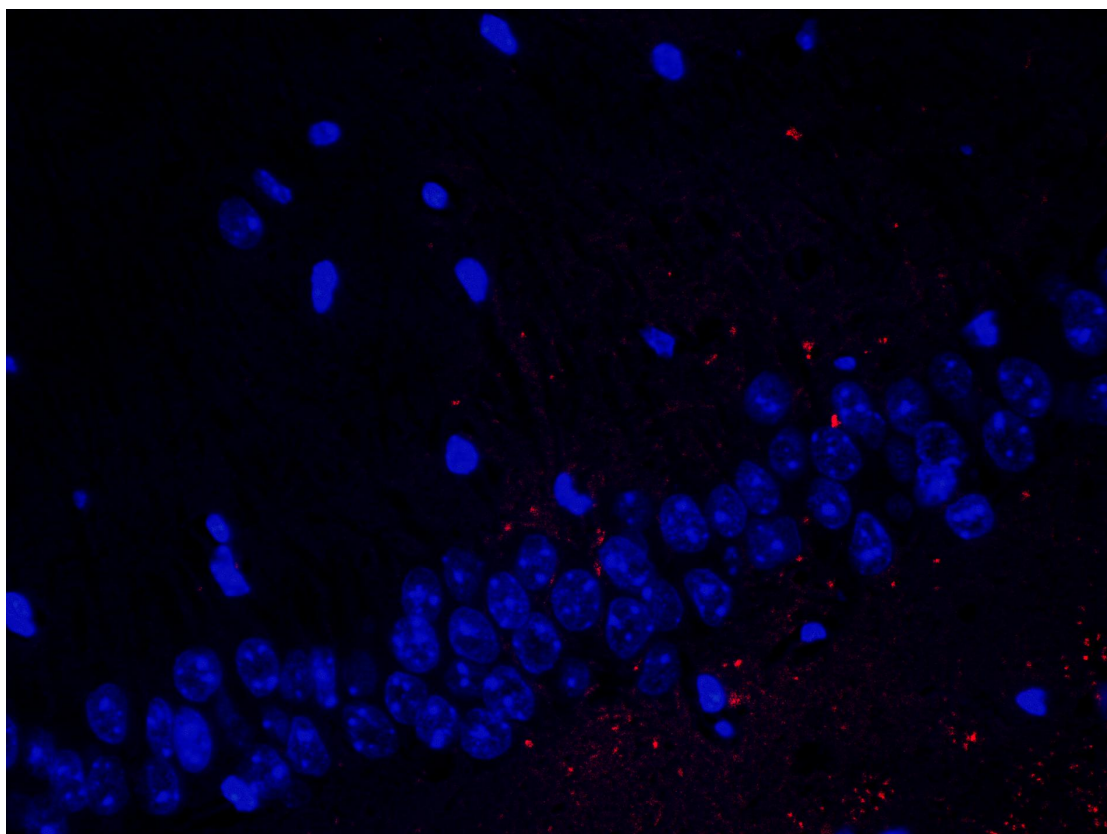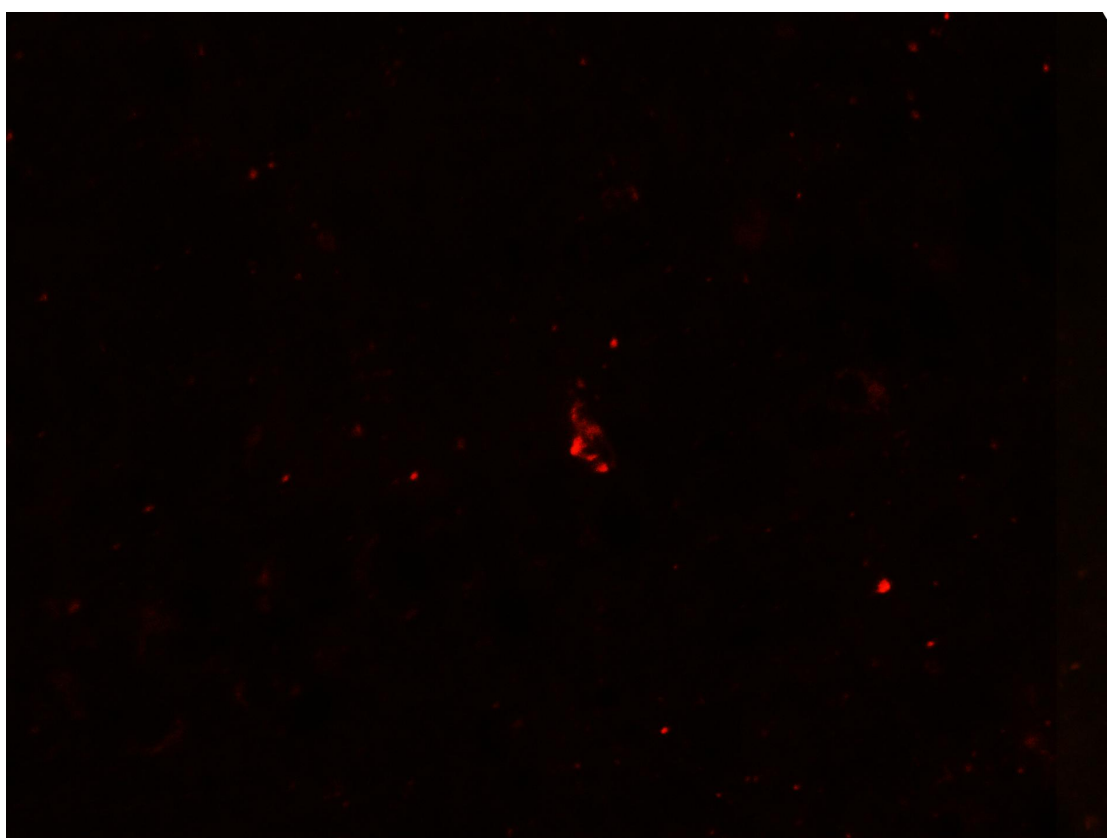

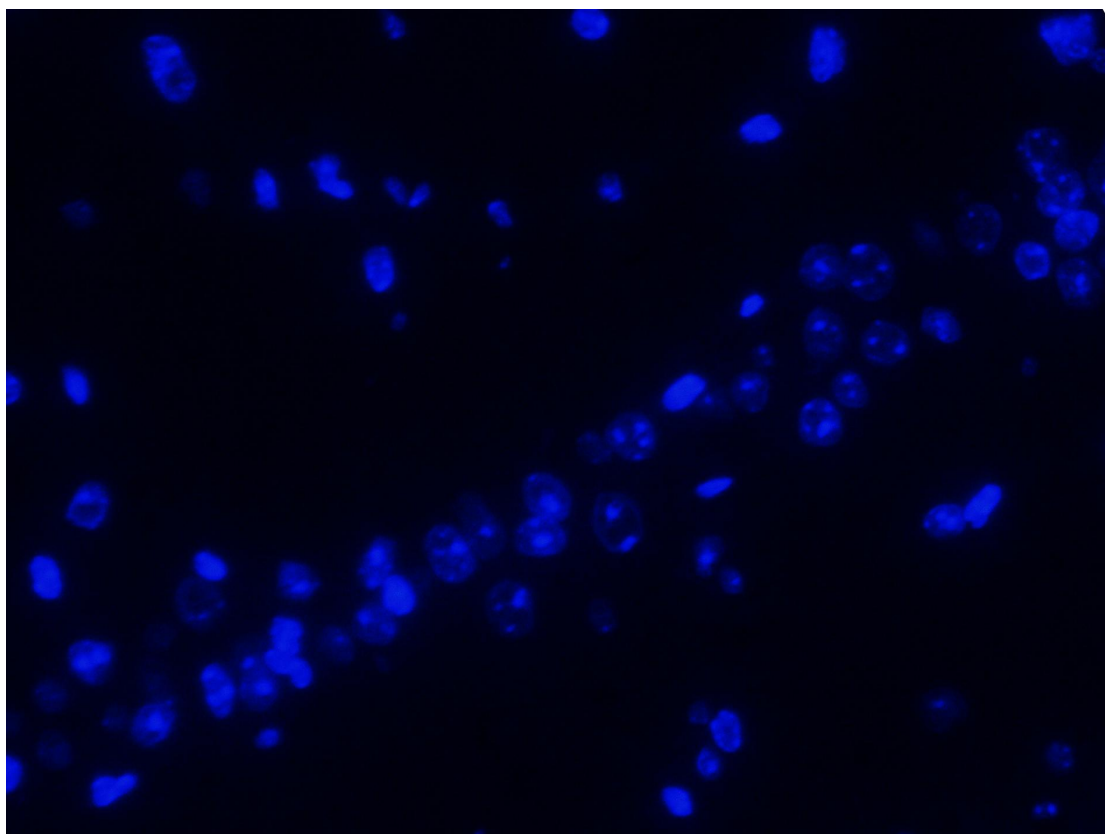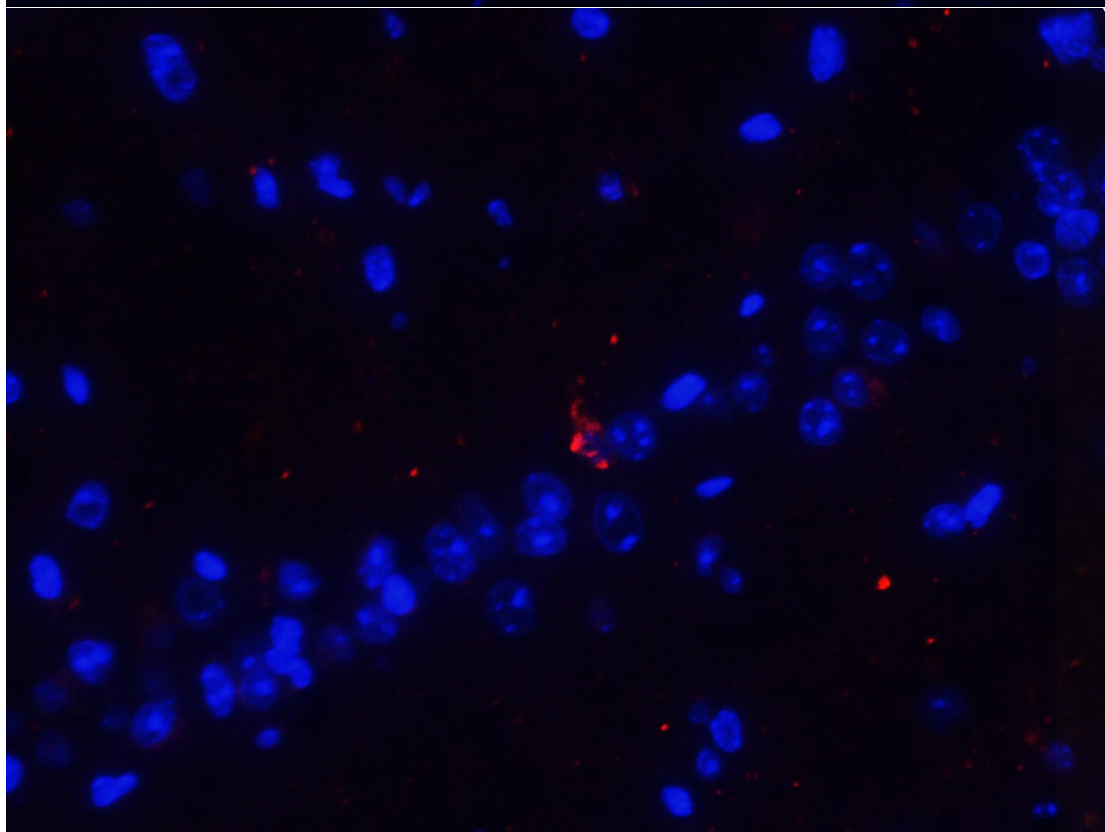



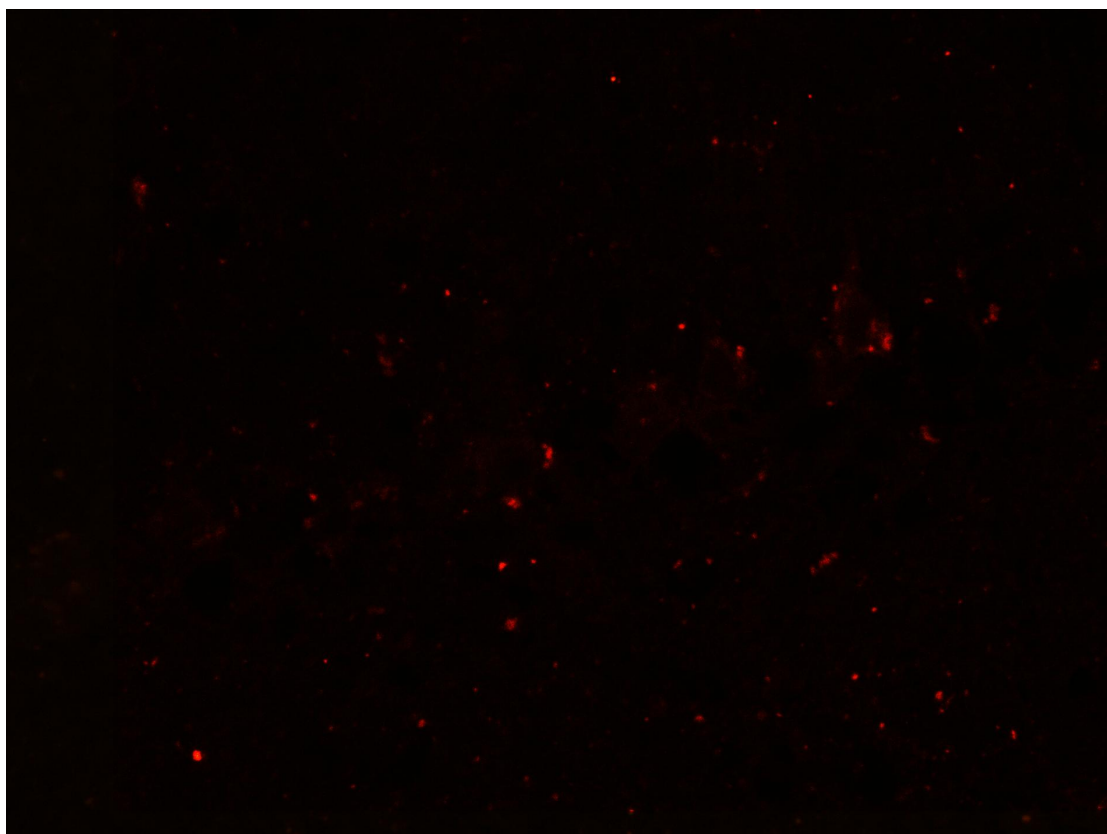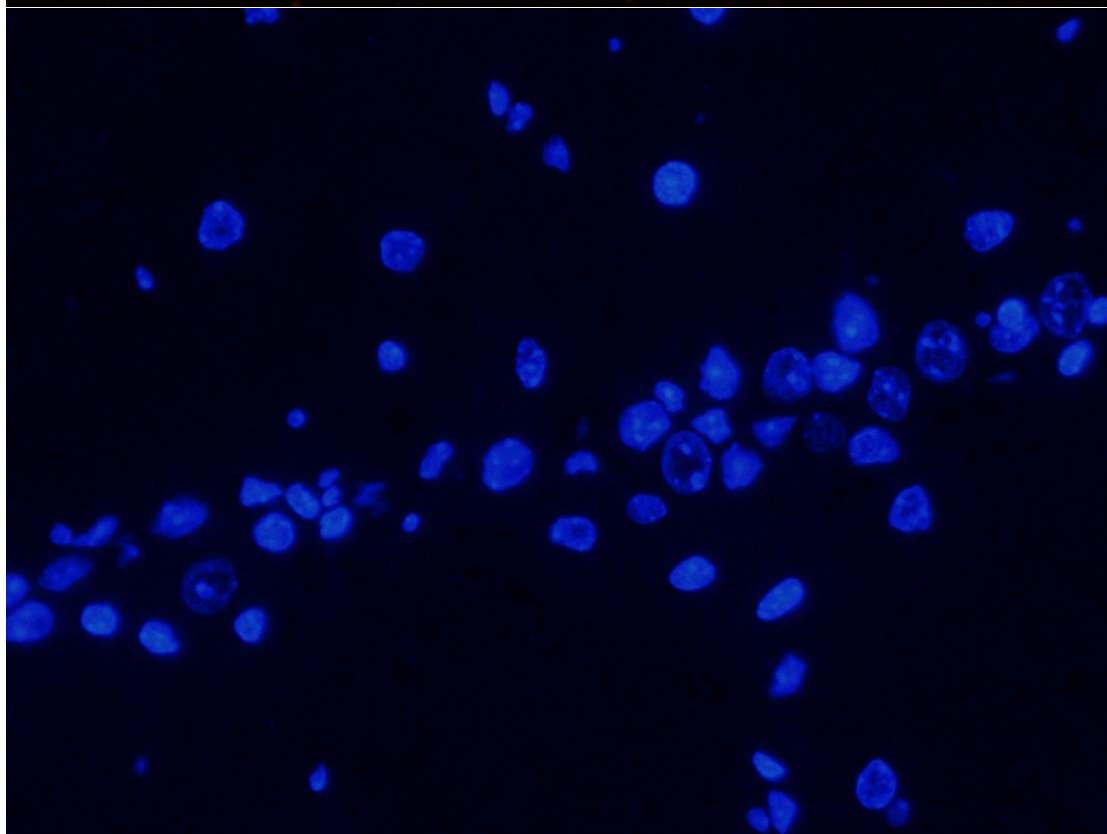

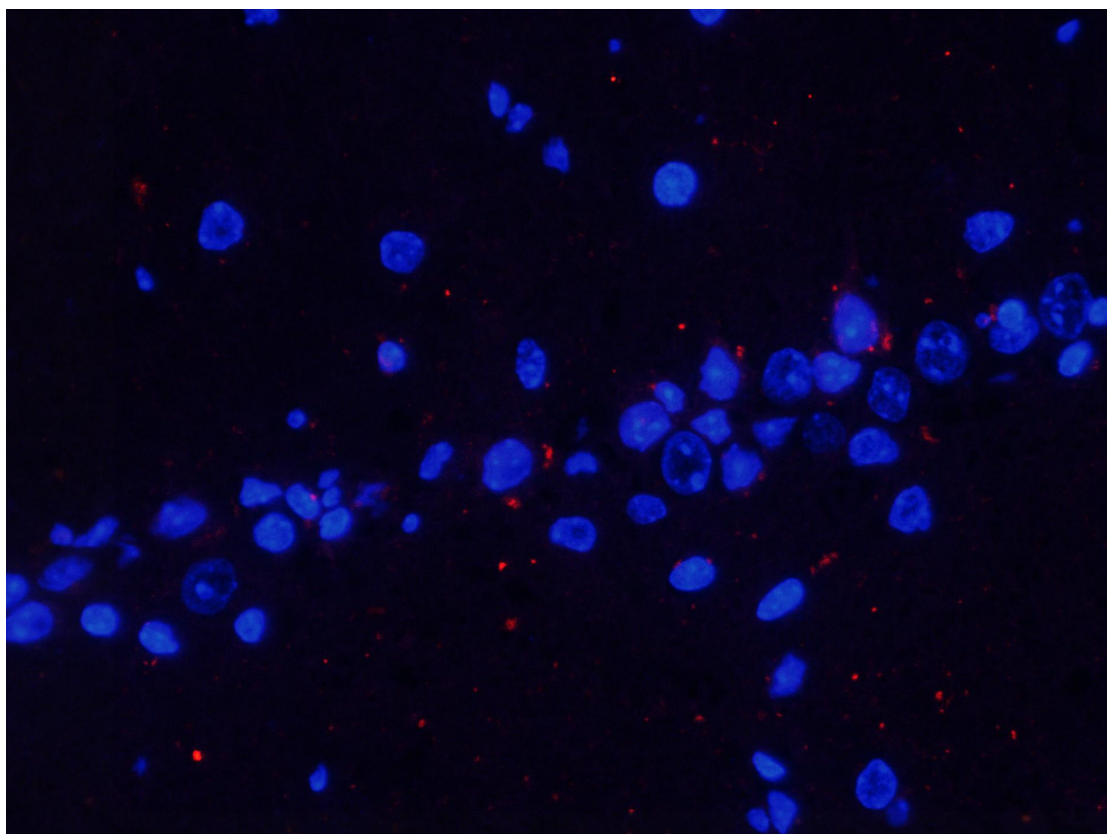

**Figure 4, D**

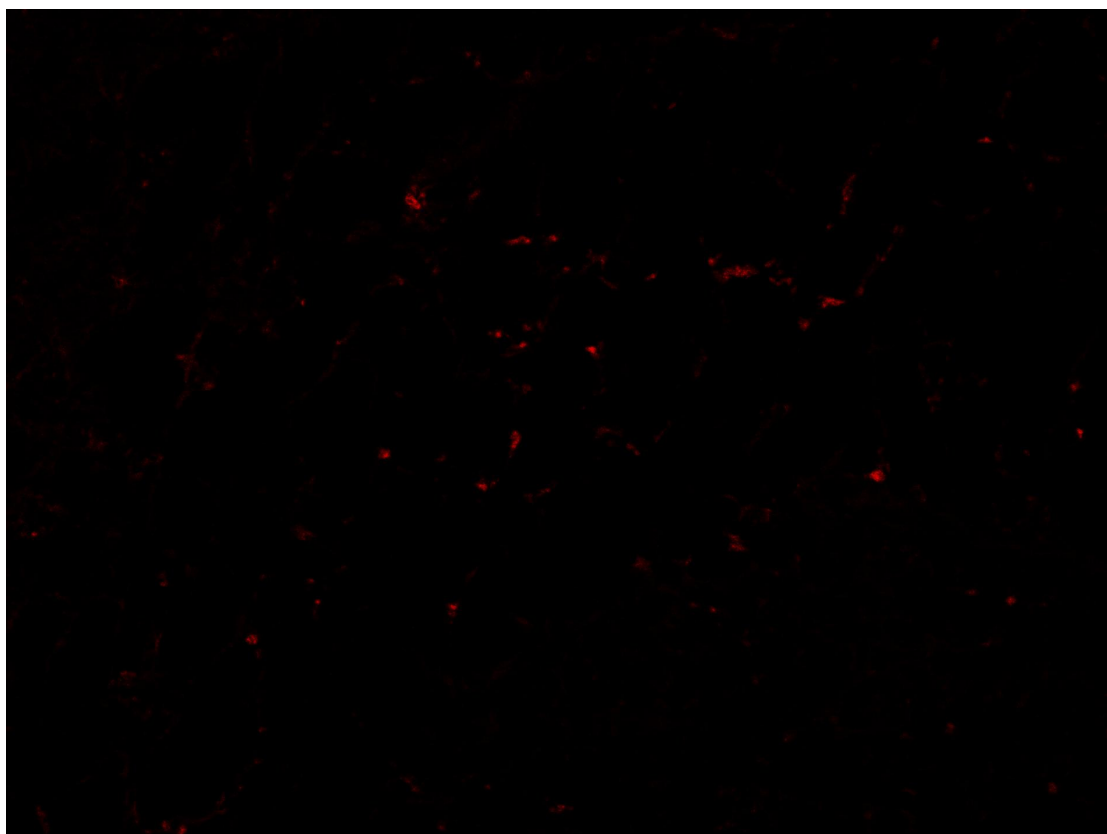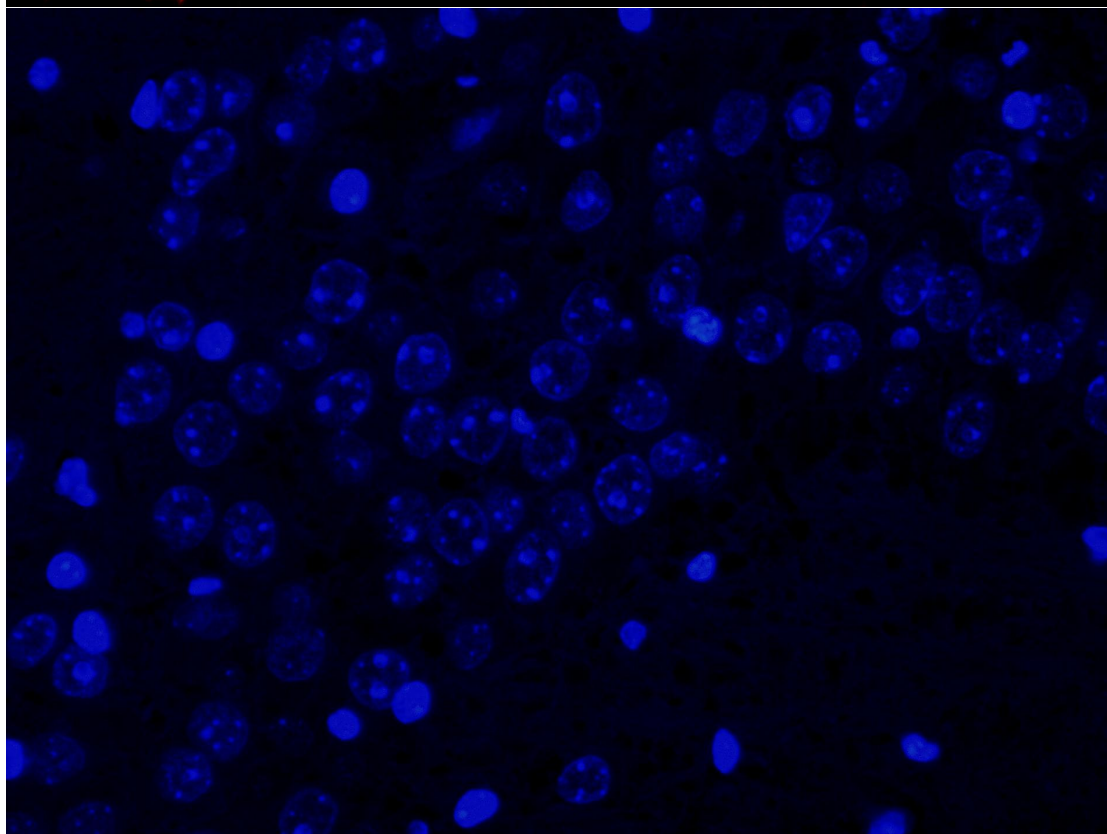

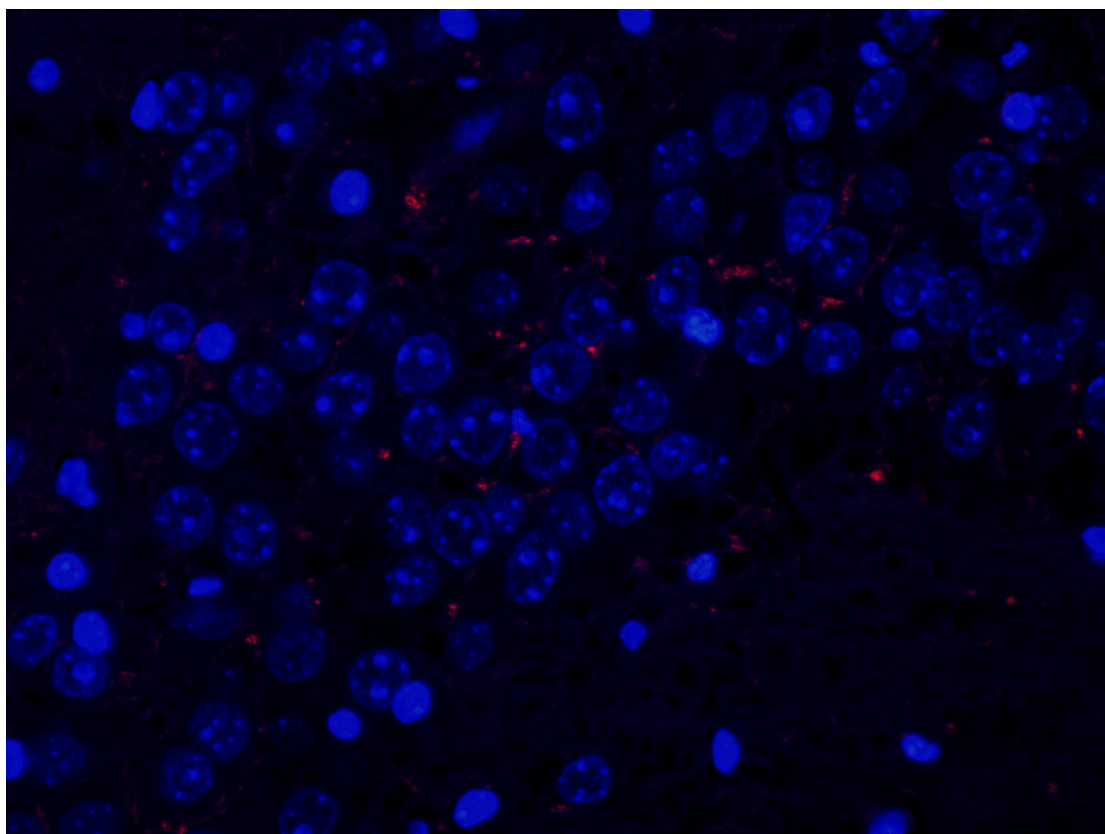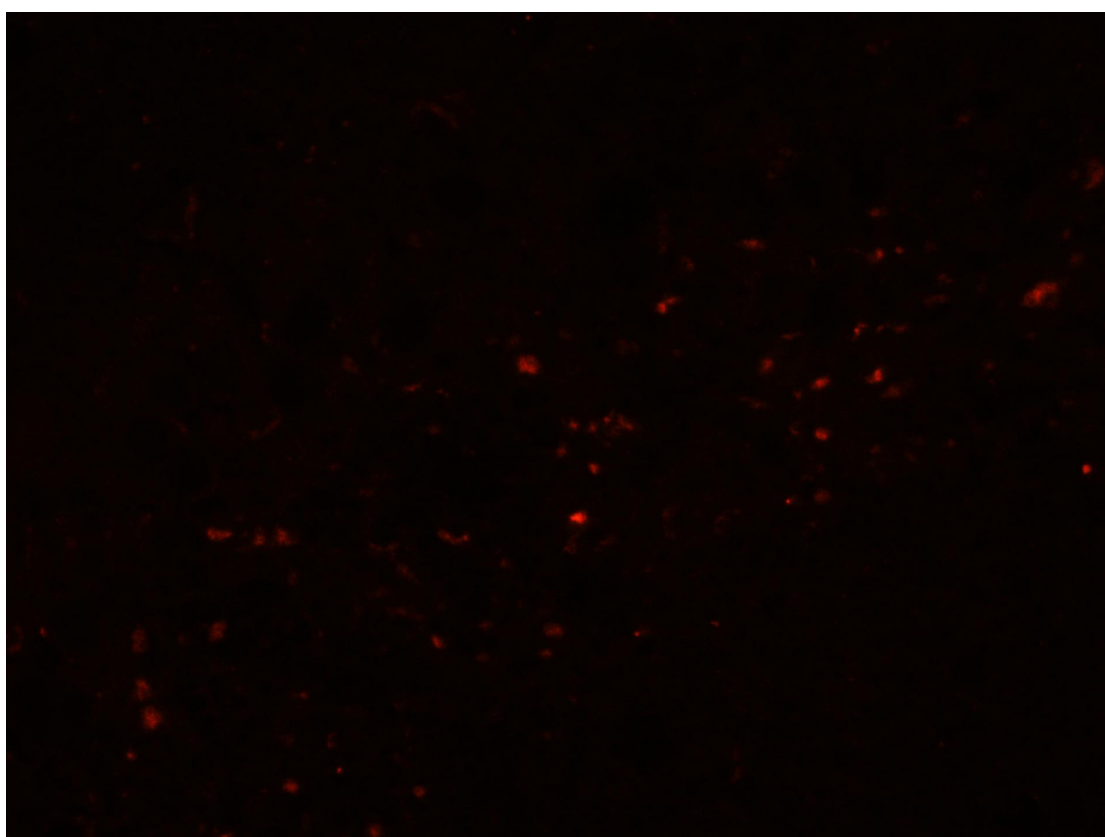



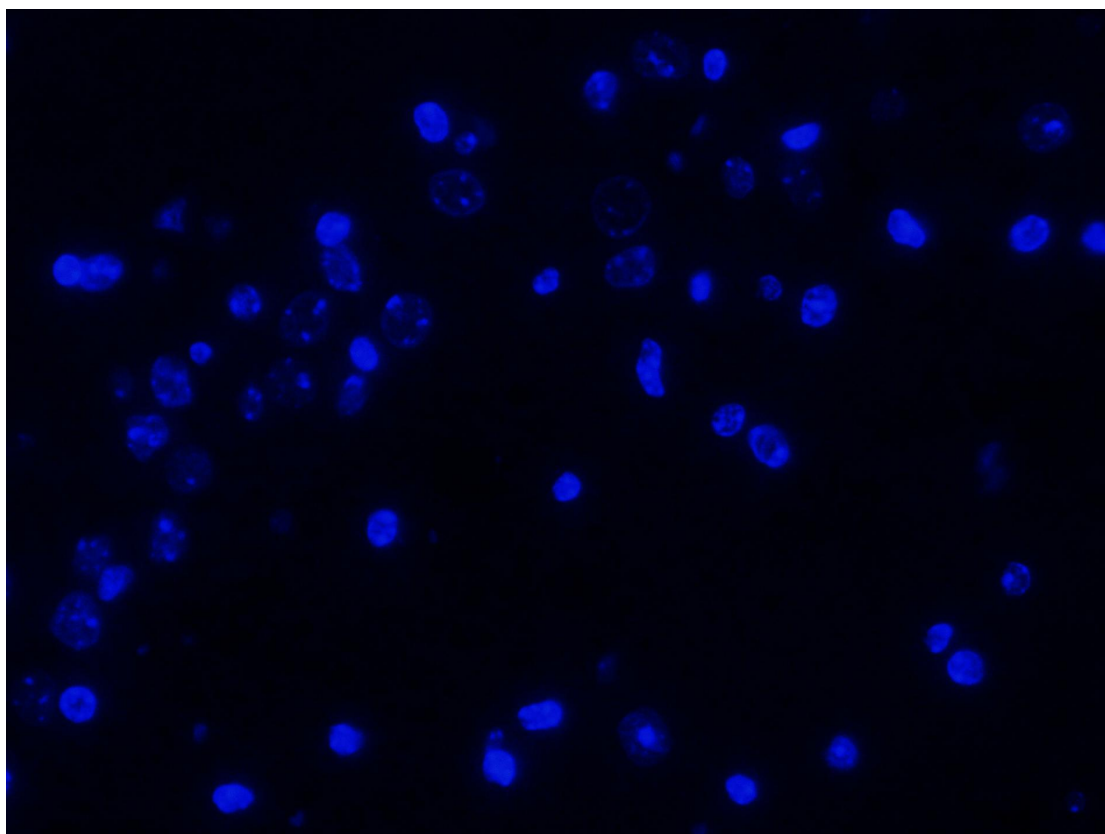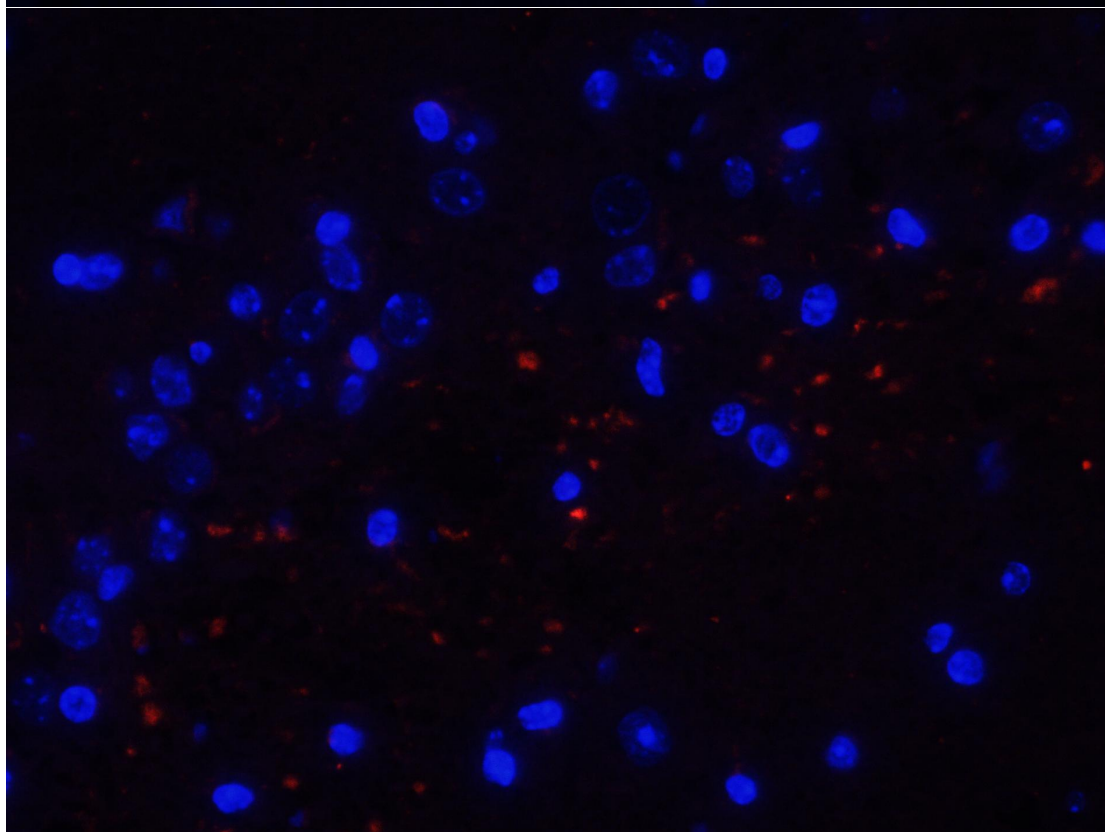

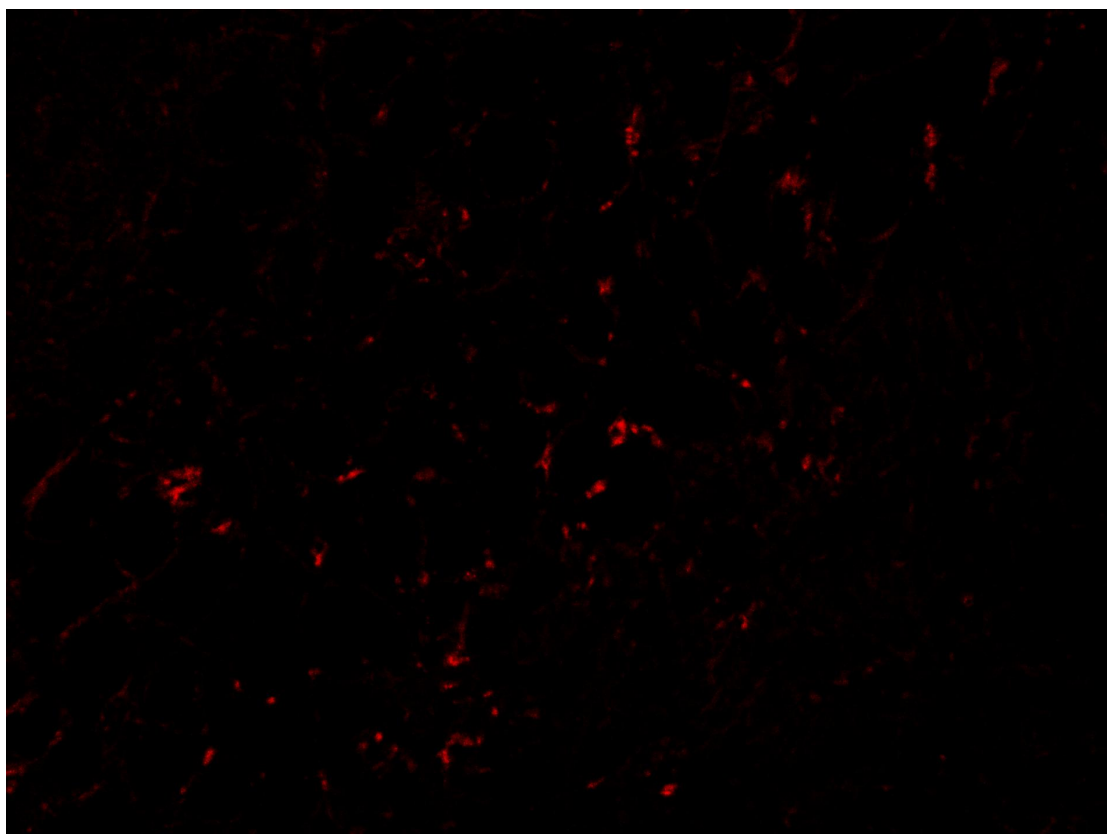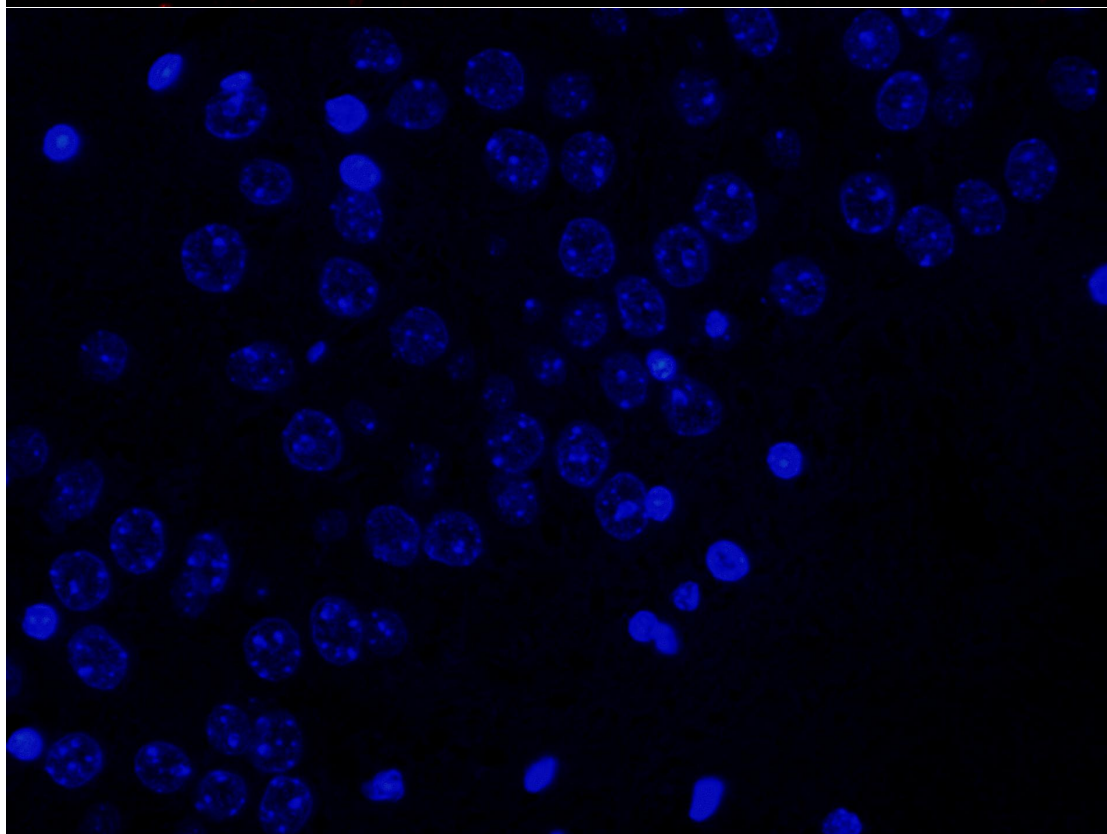

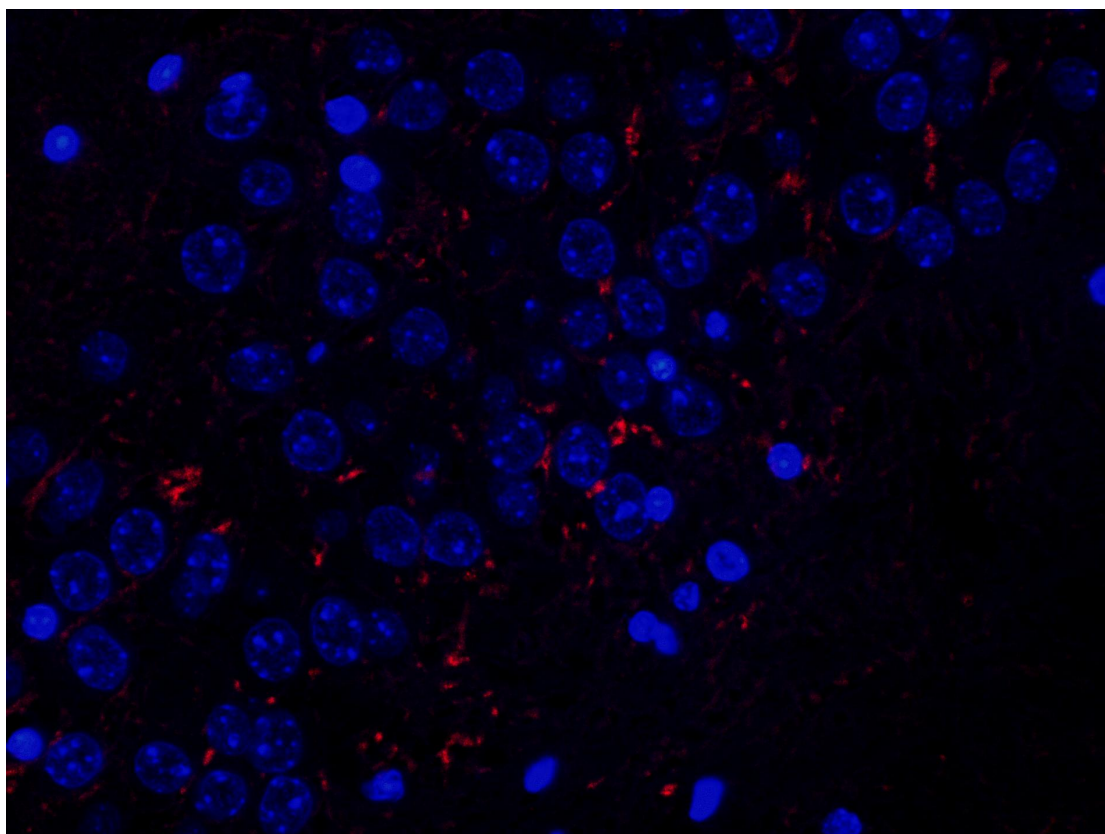

Supplement: Data_Sheet_1.PDF [file Data_Sheet_1.PDF]
