# Supplementary material for: The γ-Adducin 1–357 fragment promotes tau pathology
Source: Front Aging Neurosci. 2023 Sep 13;15:1241750. doi: 10.3389/fnagi.2023.1241750 (PMC10526357; doi:10.3389/fnagi.2023.1241750)
Supplement: Supplementary file 1 [file Table_1.XLSX]

## Sheet: Sheet1
Figure 1, B
		GAPDH							GST							HA							p-tau(Ser396)							Tau5
GST-vector		17309.5	18524.8	17834.5	16895.2	18505.9	17672.8		51796	34684.2	28590.8	45508.9	43700.7	48347.6		17031.8	16084.5	19189.8	17821.4	18709.5	18336.6		4313.96	5206.2	2437.67	4300.67	4515.1	3130.95		17500.3	15401.2	15438.1	15804.2	14541.2	13469.4
GST-γ-adducin		17069.4	16164.5	18131.2	16520.9	16888.7	17398.2		42872.2	49143.4	47874.7	34516.4	34187.9	38137.8		17914.8	16609.2	16598	17930.9	16948.4	17380.8		12811.6	10944.4	12920.9	10679.4	12784.9	12791.3		16182.8	16809.2	14203.5	15498	16703.9	14331.2
GST-γ-adducin(1-357)		18408	17776.6	16310	18209.9	17604.1	17264.5		44321.6	31972.4	45264.6	46475.7	40122.1	43347.2		18180.6	17282.8	17574.1	16590.2	18900.1	17112.4		16269.7	15375.2	14137.2	17134.9	14419.8	15340.9		15546.9	14066	14022.1	15656.7	14687.2	16127.2
									GST/GAPDH							HA/GAPDH							Ser396/Tau5							Tau5/GAPDH
									2.99234	1.87231	1.60312	2.6936	2.36145	2.73571		0.983956	0.868269	1.07599	1.05482	1.011	1.03756		0.246508	0.338039	0.1579	0.272122	0.310504	0.23245		1.01102	0.831384	0.86563	0.935424	0.785759	0.762152
									2.51164	3.04021	2.64046	2.08926	2.02431	2.19205		1.04953	1.02751	0.915436	1.08535	1.00354	0.999		0.791682	0.651094	0.909696	0.689081	0.765381	0.892552		0.94806	0.739884	0.783376	0.938086	0.989059	0.823718
									2.40773	1.79857	2.77526	2.55222	2.27914	2.51077		0.987646	0.97222	1.0775	0.91105	1.07362	0.991195		1.04649	1.09308	1.00821	1.09442	0.98179	0.951244		0.844572	0.791262	0.859721	0.859788	0.83431	0.934126
Figure 1, D
		GAPDH							GST							HA							p-tau(Ser396)							Tau5
GST-vector		15591.7	15491.8	15477.5	15976.6	13710.3	17118.4		42409.5	40750.1	39409.2	40325.6	44466.4	54003.4		16284.2	15383.5	14762.1	15725.5	14773.2	14742.4		8080.97	9806.02	6420.37	9651.56	10201.8	7359.17		14258.6	16191.2	16028.8	13535.4	14225.4	14158.7
GST-γ-adducin		16213.5	17017.6	16489.9	15893.4	16222.5	17938.9		48619.4	51609.8	52114.9	35048.7	44418.7	42845.6		13765.6	15039.2	14053.2	15743.7	15816	18418		12885	11090.3	14905.5	12606.9	11357.9	14152.8		15385.7	14323.5	13917.4	14383.2	17726.5	16608.5
GST-γ-adducin(1-357)		16180.3	16848.3	15171.9	15115.4	15579.4	16013.1		48199.1	44608.8	42911.7	40977.1	45615.1	40911.7		14684.3	15008	15408.4	14492.8	15651.5	15090.7		18864.7	17862.5	17352.5	18037.1	18579.8	18136.4		14196.8	14105.3	12635.8	16392.1	16200.4	14872
									GST/GAPDH							HA/GAPDH							Ser396/Tau5							Tau5/GAPDH
									2.72001	2.63043	2.54622	2.52403	3.24329	3.1547		1.04442	0.99301	0.953774	0.984281	1.07752	0.861202		0.566744	0.605639	0.400551	0.713062	0.717156	0.519763		0.9145	1.04515	1.03562	0.847198	1.03757	0.827106
									2.9987	3.03273	3.16041	2.20523	2.73809	2.38842		0.849018	0.88374	0.852233	0.990579	0.974944	1.02671		0.837467	0.774275	1.071	0.876501	0.640728	0.85214		0.948945	0.841686	0.843993	0.904975	1.09271	0.925842
									2.97888	2.64768	2.82836	2.71095	2.92791	2.55489		0.907542	0.890771	1.01559	0.958811	1.00463	0.942401		1.3288	1.26636	1.37328	1.10036	1.14687	1.2195		0.877414	0.837197	0.832841	1.08446	1.03986	0.92874
Figure 2, B
		GAPDH							GFP							p-tau(Ser396)							Tau5
GFP-vector		17254.3	14646.8	15474.9	13071.9	14859.8	14465.3		46270.3	51674.4	54107.6	44254.9	49745.1	49124.8		9341.67	9799.91	9767.2	9376.8	9991.87	9233.33		17226.1	16912.1	16616.8	15296.5	16457.8	15892.1
GFP-γ-adducin		14725.3	15139.7	15073.1	15198.2	15248	14266.5		50194.6	44491.5	48494.3	49948	44409.6	44293.7		13250.1	13882.7	15426.1	13146.3	13243.2	14905.3		15697.2	16874.3	15999.6	16095.8	16750.7	16108.5
GFP-γ-adducin(1-357)		13358.3	14216.1	13719.6	15531.6	14861.9	16549.3		44508.6	45602.8	40582.1	46390.5	44233.5	40691.6		19614	19890.6	18670.9	19344.7	20559.6	20496.5		15543.1	16143.6	15058	16647.4	16635.6	16382.4
									GFP/GAPDH							Ser396/Tau5							Tau5/GAPDH
									2.68166	3.52802	3.49647	3.38551	3.34763	3.39605		0.542296	0.579462	0.587791	0.613002	0.607122	0.581003		0.998367	1.15466	1.07379	1.17019	1.10753	1.09864
									3.40873	2.93872	3.21727	3.28645	2.9125	3.10474		0.844105	0.822714	0.964153	0.816755	0.790608	0.925305		1.066	1.11457	1.06147	1.05906	1.09855	1.12912
									3.33191	3.20783	2.95796	2.98684	2.97631	2.4588		1.26191	1.23211	1.23994	1.16202	1.23588	1.25113		1.16356	1.13559	1.09755	1.07184	1.11935	0.989912
Figure 2, C
		p-tau(Ser396) fluorescence intensity
GFP-vector		8.891	4.924	7.865	8.91	8.302	8.351
GFP-γ-adducin		13.169	14.277	13.74	10.329	10.438	14.586
GFP-γ-adducin(1-357)		21.492	22.076	19.554	22.869	27.72	26.628
Figure 3, B
		GAPDH							CDK5							P35							Akt							pAkt							pGSK3β(Ser9)							pGSK3β(Thr216)
GFP-vector		14819.5	14734.1	15990.7	15129.8	12267.6	11320.9		12252.7	16767.8	16488	14768.7	14203.8	14646.5		13106.9	11626.1	13337.2	12789.2	11514.5	13097.6		14589.7	15824.1	14512	12865.8	14329.2	13683.4		16186.6	17779.9	16624.1	15972.5	18283.6	18229.2		14923	17866.4	18884.6	19965	17716.5	17396.7		2640.31	8431.21	10073.1	3136.34	8073.11	9314.39
GFP-γ-adducin		13914.6	13432.8	13182	12852.9	13322.1	14248.5		16500.6	16119.5	14885.2	15530.8	15170.6	13420.4		13154	13228.2	10772.8	12425.7	12966.3	11792.3		15095	14744.8	14148.3	14421.4	14360.5	14757		17801.9	17204	16577.6	15596.6	17522.4	15656.5		12309.4	15641.2	12574.1	12083.9	13560.1	13215.2		11841.9	15294.6	13109.8	11551.1	12513	14036.5
GFP-γ-adducin(1-357)		11571.9	12307.1	14613.2	15236.2	14982.1	14921.7		14345.8	14700.2	15359.3	14390.9	15501.2	14792.8		12053.6	14213	12495.7	12589.3	14507.5	12430.8		12679.7	13975.7	13004.1	16930.1	16292.4	16017.1		16058.8	16894	15527.1	17291.8	17469.7	17357.8		4424.06	6023.62	7447.78	5518.05	6418.69	6479.26		16710.3	18676.2	21803.2	18680.9	20043	19564.2
									CDK5/GAPDH							P35/GAPDH							Akt/GAPDH							pAkt/Akt							pGSK3β(Ser9)/GSK3β(Y174)							pGSK3β(Thr216)/GSK3β(Y174)
									0.826794	1.13803	1.0311	0.97613	1.15783	1.29375		0.884437	0.789061	0.834062	0.845297	0.938611	1.15694		0.984492	1.07398	0.907527	0.850359	1.16805	1.20868		1.10946	1.1236	1.14554	1.24147	1.27597	1.33221		1.80824	1.68466	1.56296	1.42039	1.34002	1.45341		0.319929	0.794994	0.833686	0.223132	0.610625	0.778173
									1.18585	1.20001	1.1292	1.20835	1.13875	0.941883		0.945334	0.984766	0.817233	0.966768	0.97329	0.827617		1.08483	1.09767	1.0733	1.12204	1.07795	1.03569		1.17933	1.16678	1.1717	1.08149	1.22018	1.06095		0.847404	1.2092	0.952818	1.4342	1.27715	1.10302		0.81522	1.1824	0.993412	1.37097	1.17853	1.17158
									1.23971	1.19445	1.05106	0.944522	1.03465	0.991361		1.04163	1.15486	0.855097	0.826275	0.968322	0.83307		1.09573	1.13558	0.889892	1.11118	1.08746	1.07341		1.2665	1.20882	1.19401	1.02137	1.07226	1.0837		0.384489	0.537429	0.625614	0.457405	0.549514	0.616993		1.45227	1.6663	1.83147	1.54851	1.71591	1.86302
Figure 3, D
		GAPDH							GFP							pGSK3β(Ser9)							pGSK3β(Thr216)							pGSK3β(Y174)							Ser396							Tau5
GFP-vector		24186.1	23577	23186.9	23576.9	25263.8	25207.8		44788.9	42163.8	45205.5	40549.1	49007.5	51724.7		23432.2	25735.3	27859.2	22249	23228.6	23738.5		18717.7	18368.5	17934.7	18331.7	17043.1	17043.1		18732.1	23779.2	20744.9	19523.8	24399.9	22531.9		15309	15506.3	14956.4	14641.2	15406.9	15233.7		21465.8	21934.8	21465.7	25934.8	26694.5	25217.7
GFP-vector+TDZD-8		25044.4	24919.4	24044.3	23919.2	28251.5	25908.7		42854.8	41197.8	46459.5	46209	50259.8	42196.3		27372.8	28662.9	30143.3	30104.9	30711.1	31222.6		11032.2	11986.6	11387.3	11147.6	10698.2	10616.6		21256.4	23622	20219.7	20111.7	22467.4	20355.7		13371.7	14535.5	13843.3	14180	12907.4	12895		24588.4	23878.9	27588.4	27878.9	23511	25216.3
GFP-γ-adducin		24946.7	24033.9	24046.4	24034	26556.5	25691.8		46304	43367.1	41926.5	44330.7	51641.3	48827.3		17058.9	16699.9	17845.9	18009.7	18669.8	18201.9		23070.7	23365.7	23235.3	23230.3	21741.1	21503.8		25457.8	24348	20633.1	22701.5	22237.3	21354.2		23403.5	22302.3	22458.2	22182.8	23416	23301.1		25411.1	24771.6	25411.2	23771.6	24839.8	26070.8
GFP-γ-adducin+TDZD-8		27886.2	22553.5	24086.8	24953.5	22838.5	27128.8		53099.1	41278	43383.7	41946.7	38920.8	45937.3		22274	22217.2	20649.5	21231.3	22246.7	21621.3		8860.98	10825.1	10240.2	10417.7	11008.6	11008.6		24784.2	20638.1	21219.7	22078.9	18461.8	18374.2		15432.9	15720.2	16610.5	15845.8	15750.3	15510		25477.7	25562.5	25797.8	24562.5	23642.7	25018.2
GFP-γ-adducin(1-357)		25943.3	26899.3	23943.9	24899.3	26693.6	26921.2		43086.8	43466.8	39323	45158.6	42705.2	42101.3		12374.5	11885.8	12173.9	11779.4	10914.3	12793.8		27817	27575.3	30404.2	29967	26629.4	29396.1		25365.3	22561.5	21354.2	22347.8	17773.5	21370.4		28292.3	27772.4	27640.6	28777.6	27775	27775		25452.8	25007	25452.8	25007	23769.5	25166
GFP-γ-adducin(1-358)+TDZD-8		23794.1	26553.4	23794.1	24553.4	26417.7	25139		40184.4	43117.5	37839.4	37735.9	39849.6	40078.4		16181.4	17292	16162.4	17465.1	18610	18336.1		11288.5	11348.5	11434.2	11773.6	11656.5	11379.5		21143.6	19426.6	18131.3	19854.2	19741.8	20741.8		17285.5	17260.4	17563.4	17449.1	17827.3	15846.7		25390.4	26567.9	25390.7	24567	27639.5	27073.7
									GFP/GAPDH							pGSK3β(Ser9)/GSK3β(Y174)							pGSK3β(Thr216)/GSK3β(Y174)							pGSK3β(Y174)/GAPDH							Ser396/Tau5							Tau5/GAPDH
									1.85185	1.78835	1.94961	1.71986	1.93983	2.05193		1.25091	1.08226	1.34295	1.13958	0.951993	1.05355		0.999232	0.77246	0.864537	0.938941	0.698489	0.756398		0.774501	1.00858	0.89468	0.828088	0.965808	0.893847		0.713182	0.706929	0.69676	0.564541	0.577158	0.604088		0.887526	0.930349	0.925765	1.1	1.05663	1.00039
									1.71115	1.65324	1.93224	1.93188	1.77901	1.62865		1.28774	1.2134	1.49079	1.49689	1.36692	1.53385		0.519004	0.507432	0.563181	0.554284	0.476165	0.521557		0.848749	0.947936	0.840934	0.840818	0.795262	0.785669		0.54382	0.608719	0.501778	0.508628	0.548993	0.511375		0.981793	0.958244	1.1474	1.16554	0.832203	0.973275
									1.85612	1.80441	1.74357	1.8445	1.94459	1.9005		0.670086	0.685884	0.864914	0.793326	0.839569	0.852384		0.906234	0.959655	1.12612	1.02329	0.977684	1.00701		1.02049	1.01307	0.858056	0.944558	0.83736	0.831165		0.920994	0.90032	0.88379	0.933164	0.942678	0.893764		1.01862	1.03069	1.05676	0.989082	0.935359	1.01475
									1.90413	1.83022	1.80114	1.68099	1.70418	1.6933		0.898719	1.07652	0.97313	0.961608	1.20502	1.17671		0.357526	0.524522	0.482582	0.471839	0.59629	0.599131		0.88876	0.915071	0.880966	0.884802	0.808362	0.677296		0.605742	0.614969	0.643875	0.645123	0.666181	0.61995		0.913631	1.13342	1.07103	0.98433	1.03521	0.922199
									1.66081	1.61591	1.64229	1.81365	1.59983	1.56387		0.487853	0.526818	0.570093	0.527096	0.61408	0.598671		1.09665	1.22223	1.4238	1.34094	1.49826	1.37555		0.977721	0.838738	0.891841	0.897526	0.665834	0.793812		1.11156	1.11058	1.08596	1.15078	1.16851	1.10367		0.981092	0.929654	1.06302	1.00433	0.890458	0.934802
									1.68884	1.6238	1.59029	1.53689	1.50845	1.59427		0.765307	0.890123	0.891405	0.87967	0.942669	0.884017		0.533894	0.584176	0.630634	0.593003	0.590447	0.548626		0.888609	0.731604	0.762011	0.808612	0.747297	0.825085		0.68079	0.64967	0.691726	0.710266	0.644993	0.585317		1.06709	1.00055	1.0671	1.00055	1.04625	1.07696
Figure 4, B
		GAPDH							GFP							Ser396							Tau5
GFP-vector		14394.1	14698.5	14563.7	13838.3	14681.3	13700.6		34115.4	40146.6	41741.6	37055.5	39175.3	40262.9		15536.6	18112.4	18732.3	17398.4	18013.3	20736		14004.7	15433.4	14952	16461	15627.2	16029.9
GFP-γ-adducin		14157.4	14431.2	14560.6	13609.8	14695	13396.4		38185.8	31481.8	34536.5	42243.4	36397.5	37757.5		11927.6	14245.9	11428.6	12572	14375.3	11726.9		15355.5	15476.7	16457.6	16167.1	15991.5	16455.8
GFP-γ-adducin(1-357)		14739.2	13823.8	13827.6	14682.4	13791	14714.5		41301.3	34961.9	34713.7	38825.3	37821.5	33621		9016.83	8514.08	6337.08	8153.23	9148.9	6267.39		16576.9	16210.6	16946.6	16759.6	16402.2	16872.7
									GFP/GAPDH							Ser396/Tau5							Tau5/GAPDH
									2.3701	2.73134	2.86613	2.67776	2.66838	2.93877		1.10938	1.17359	1.25283	1.05695	1.15269	1.29358		0.97295	1.05	1.02666	1.18953	1.06443	1.17001
									2.69724	2.18151	2.37191	3.1039	2.47686	2.81847		0.776766	0.92047	0.694425	0.777626	0.898937	0.712628		1.08463	1.07245	1.13028	1.1879	1.08822	1.22837
									2.80215	2.52911	2.51047	2.64434	2.74248	2.28488		0.543939	0.525216	0.373944	0.486481	0.557785	0.371452		1.12468	1.17266	1.22557	1.14148	1.18934	1.14667
Figure 4, C-D
		Ser396 in CA1 fluorescence intensity					Ser396 in CA3 fluorescence intensity
GFP-vector		0.96	1.697	1.108	1.176		0.861	0.955	0.829	1.14
GFP-γ-adducin		2.842	2.122	3.572	2.625		3.067	1.932	2.441	2.518
GFP-γ-adducin(1-357)		4.255	5.723	3.389	5.335		6.694	5.373	5.948	7.156
